# Supplementary material for: Investigation of multiple sclerosis-related pathways through the integration of genomic and proteomic data
Source: PeerJ. 2021 Sep 6;9:e11922. doi: 10.7717/peerj.11922 (PMC11563213; doi:10.7717/peerj.11922)
Supplement: Supplemental Information 1 [file peerj-09-11922-s001.xlsx]

## Sheet: Supplemental Table S1
Table S1. SNPs included in the pathway analysis.
SNP ID	Minor allele count (Cases)	Minor allele count D (Controls)	Corr/Trend P-value	Gene Symbol
rs7873	8	3	4.39e-07	IGF2
rs17187282	6	2	1.17e-06
rs11688088	5	1	2.8e-06
rs654188	7	3	5.24e-06	ZNF558
rs7092208	7	5	9.66e-06	MGMT
rs10519014	5	2	2.25e-05
rs16990774	5	2	2.25e-05	EFCAB6
rs17420584	5	2	2.25e-05
rs6558447	16	26	2.37e-05
rs11860965	11	13	2.38e-05
rs10829791	12	19	2.48e-05
rs4933939	15	26	2.74e-05
rs844959	6	1	3.11e-05
rs9388582	6	4	3.68e-05	C6orf174
rs4605385	9	10	3.75e-05	SCN9A
rs6737602	15	30	4.46e-05	STK39
rs498973	3	0	4.69e-05	PLXDC1
rs4841394	3	0	4.69e-05	UNQ9391
rs6660186	3	0	4.69e-05
rs7377981	3	0	4.69e-05	WHSC1
rs9436913	3	0	4.69e-05
rs11696329	3	0	4.69e-05	ATP9A
rs2656219	4	1	4.71e-05	CNTN5
rs10989157	4	1	4.71e-05
rs34794394	4	1	4.71e-05
rs536532	12	17	4.86e-05
rs4388122	8	9	5.08e-05
rs13271536	7	5	5.41e-05
rs6858970	3	0	5.41e-05
rs9964425	1	62	5.58e-05
rs11974028	11	15	6.59e-05
rs12988176	6	3	6.68e-05	GTF2A1L
rs5917283	11	11	7.69e-05
rs474241	10	13	7.79e-05	CNTN5
rs6019266	10	13	7.79e-05
rs17708914	10	13	7.79e-05
rs13061453	14	24	9.21e-05	CHCHD6
rs2249115	11	16	0.000105	CLDN14
rs4417745	5	3	0.000125
rs11790551	5	3	0.000125	GNA14
rs17058979	5	3	0.000125	PNOC
rs2620016	11	15	0.000132
rs10756571	10	14	0.000133
rs2834646	7	6	0.000138	RUNX1
rs4618543	7	6	0.000138	RLBP1L2
rs10762982	11	16	0.000201
rs7356599	6	4	0.000203	MYO10
rs9944095	1	55	0.000222
rs650957	1	56	0.000223
rs2426913	7	8	0.000225
rs2462915	7	8	0.000225
rs4980041	13	23	0.000225
rs10519721	8	11	0.000236
rs9532539	18	42	0.000242
rs2272504	11	18	0.000246	TRHDE
rs1332817	9	13	0.000254
rs10160702	9	13	0.000254	KIRREL3
rs5910394	18	36	0.000254	DOCK11
rs2376481	15	33	0.000264	GABRA5
rs11953155	0	45	0.000272
rs5994128	13	24	0.000303	GAB4
rs6005159	13	24	0.000303
rs7122320	13	24	0.000303	CNTN5
rs599462	7	7	0.000313
rs7865653	7	7	0.000313
rs6760801	10	13	0.000321	CCDC85A
rs5951875	5	1	0.000326
rs4255775	4	3	0.000327
rs6459534	17	44	0.000338
rs17435387	10	16	0.000347
rs12123953	11	16	0.00035	GIPC2
rs4980047	11	19	0.000365
rs6869645	4	2	0.00037	SLC6A3
rs7850420	4	2	0.00037	MAPKAP1
rs9466503	4	2	0.00037
rs12417295	4	2	0.00037	FLJ32810
rs12485136	4	2	0.00037	PNPLA5
rs16864324	4	2	0.00037
rs16984253	4	2	0.00037	MYT1
rs34853349	4	2	0.00037
rs35206614	4	2	0.00037	ATP7B
rs2875237	6	6	0.000372	GRM7
rs4973986	6	6	0.000372	ULK4
rs10828096	6	6	0.000372
rs17311679	6	6	0.000372	VRK3
rs1774847	17	42	0.000385	TMEM183A
rs2295794	2	57	0.000389	TLN1
rs3008639	4	2	0.000421	AIDA
rs2414893	11	21	0.000425	MEGF11
rs7935933	9	14	0.000435	CCDC81
rs12297776	9	14	0.000435	ERGIC2
rs6861000	12	23	0.000446
rs507280	8	12	0.000455	ROS1
rs733126	8	12	0.000455	USH1C
rs11190831	8	12	0.000455	TLX1NB
rs502156	5	4	0.000478
rs1477717	5	4	0.000478
rs2370473	5	4	0.000478	FLJ44048
rs2804118	5	4	0.000478
rs4611723	5	4	0.000478
rs4751086	5	4	0.000478	MGMT
rs4766819	5	4	0.000478	FBXW8
rs7249176	5	4	0.000478
rs9543631	5	4	0.000478
rs16899078	5	4	0.000478	CDH12
rs17537498	5	4	0.000478
rs4972701	17	37	0.000486	WIPF1
rs8025178	14	27	0.000491
rs2104391	12	25	0.000492	LOC169834
rs16971450	10	14	0.000492	MTHFS
rs17464525	6	5	0.000519	AP4B1
rs7103638	13	26	0.000531
rs11121039	13	23	0.000537
rs2034360	10	17	0.000537	PRKCE
rs17080136	10	17	0.000537	MAPK9
rs10976051	14	29	0.000537	KDM4C
rs9402954	9	13	0.000538
rs17746125	10	13	0.000553
rs9608164	9	16	0.000558
rs626657	8	11	0.000589	CACNB1
rs6957684	12	24	0.000609
rs711168	13	25	0.000619
rs1033272	10	16	0.000642	IL19
rs1958170	10	16	0.000642
rs7957125	7	8	0.000647
rs7820617	6	4	0.000656	TRIM55
rs17577398	4	1	0.000668
rs28535139	4	1	0.000668
rs17153477	12	28	0.000698
rs6577449	5	3	0.000705	CAMTA1
rs10853465	5	3	0.000705
rs12029687	5	3	0.000705
rs12712051	5	3	0.000705	AFF3
rs6657417	9	15	0.000716
rs6758291	17	44	0.000729
rs6843239	4	66	0.000736	SEC24D
rs5918486	12	19	0.000748	SRPX
rs2147852	11	21	0.000753	TBC1D4
rs12870594	7	7	0.000783	hCG_1815504
rs1395099	13	26	0.000802
rs2133127	13	26	0.000802	SNRPN
rs1497409	10	18	0.000809	POU1F1
rs2468506	12	22	0.000824
rs2032701	8	13	0.000825
rs2072793	17	45	0.000831	RBPJL
rs11003872	15	39	0.000844	PCDH15
rs12376257	9	14	0.000862
rs799157	3	1	0.000865	MLXIPL
rs1515495	3	1	0.000865	TP63
rs1917015	3	1	0.000865
rs4143858	3	1	0.000865	CNTN5
rs4933892	3	1	0.000865
rs6663477	3	1	0.000865
rs7233275	3	1	0.000865
rs7589234	3	1	0.000865	AFF3
rs7957161	3	1	0.000865	PLXNC1
rs9565321	3	1	0.000865	MYCBP2
rs9893970	3	1	0.000865	KRT34
rs10045011	3	1	0.000865	FYB
rs11671231	3	1	0.000865	LILRA5
rs11762107	3	1	0.000865
rs12771692	3	1	0.000865
rs34826242	3	1	0.000865	LOC390557
rs6437437	3	61	0.000878
rs7143254	11	20	0.000882	LRFN5
rs1228091	13	29	0.000883
rs3740829	6	7	0.000907	RICS
rs4787384	6	7	0.000907
rs7161750	6	7	0.000907
rs9853121	6	7	0.000907
rs11791292	6	7	0.000907	ADAMTSL1
rs1330884	3	60	0.000926
rs2012543	1	47	0.000934	LOC645490
rs12477118	13	31	0.000951
rs758342	3	1	0.000966	MX1
rs1545433	3	1	0.000966
rs42124	2	0	0.000969	MLXIPL
rs200240	2	0	0.000969
rs414528	2	0	0.000969	USE1
rs548927	2	0	0.000969
rs643180	2	0	0.000969
rs894046	2	0	0.000969
rs1521026	2	0	0.000969	CDH18
rs2026618	2	0	0.000969	LOC158257
rs2131905	2	0	0.000969	WDR47
rs2382868	2	0	0.000969	GTF3C1
rs3813247	2	0	0.000969	TTN
rs3816685	2	0	0.000969	JMJD1C
rs3917329	2	0	0.000969	IL1R1
rs4141583	2	0	0.000969
rs4769191	2	0	0.000969
rs4803831	2	0	0.000969	VASP
rs5978925	2	0	0.000969	KAL1
rs6051643	2	0	0.000969	DDRGK1
rs6128115	2	0	0.000969
rs6520234	2	0	0.000969
rs6560837	2	0	0.000969	DIP2C
rs6964977	2	0	0.000969	WBSCR17
rs7581919	2	0	0.000969	NBAS
rs7726659	2	0	0.000969	ANKRD31
rs7883226	2	0	0.000969
rs7905858	2	0	0.000969
rs7922385	2	0	0.000969
rs9818677	2	0	0.000969
rs9835263	2	0	0.000969
rs10486860	2	0	0.000969
rs10499905	2	0	0.000969	SGCE
rs10507452	2	0	0.000969
rs11088149	2	0	0.000969
rs11098016	2	0	0.000969	COL25A1
rs12077365	2	0	0.000969	OBSCN
rs12484542	2	0	0.000969	CSNK1E
rs12593316	2	0	0.000969
rs12686385	2	0	0.000969
rs13440231	4	0	0.000969	NR6A1
rs16867639	2	0	0.000969
rs16962962	2	0	0.000969
rs17032325	2	0	0.000969
rs17093516	2	0	0.000969	SYNE2
rs17258606	2	0	0.000969	NOTCH2
rs17549087	2	0	0.000969
rs17753596	2	0	0.000969
rs35116491	2	0	0.000969
rs35794595	2	0	0.000969	NTN1
rs6884608	10	20	0.000982
rs1947442	9	13	0.000991
rs2945145	13	24	0.000992	CTBS
rs6753123	7	10	0.000997
rs215674	11	19	0.000997
rs7765914	11	19	0.000997
rs4689340	3	58	0.00101
rs12714411	8	12	0.00103
rs12864973	8	12	0.00103	CENPJ
rs34972531	8	12	0.00103	ACACB
rs7942096	2	63	0.00103	SLC6A5
rs10506075	6	7	0.00104	DENND5B
rs9313673	15	36	0.00105
rs10507262	2	0	0.00107
rs11795470	2	0	0.00107
rs17038868	2	0	0.00107
rs13068891	10	16	0.00107
rs3909282	12	26	0.00109	JPH3
rs6426030	12	23	0.0011	EPHA10
rs11813392	12	23	0.0011
rs4263805	9	12	0.0011
rs5912259	13	22	0.00113	P2RY10
rs7585987	13	29	0.00114
rs745932	7	10	0.00115	PHLPP1
rs1410116	6	6	0.00116	SUCLA2
rs9849137	6	6	0.00116
rs9887812	6	6	0.00116	BCL10
rs11617401	6	6	0.00116	RAB20
rs4771759	12	30	0.00118
rs6880023	10	19	0.00119
rs2800092	18	50	0.0012
rs11119860	18	50	0.0012
rs7260235	8	11	0.0012	TPM4
rs7387323	8	11	0.0012
rs1236612	13	21	0.00121
rs182618	11	21	0.00122	LCP2
rs383133	11	21	0.00122	ZNF221
rs4475691	11	21	0.00122	SAMD11
rs4656671	11	21	0.00122	NME7
rs629315	7	9	0.00123	PF4
rs926543	7	9	0.00123	CACNG2
rs1275097	7	9	0.00123
rs6081050	7	9	0.00123
rs8004569	7	9	0.00123	STXBP6
rs9830450	4	64	0.00125	ADAMTS9
rs734351	16	42	0.00126	IGF2
rs5907448	14	27	0.00128	SLITRK4
rs12201977	14	33	0.00129
rs428378	17	46	0.00131
rs16922198	13	28	0.00131	RCL1
rs6705170	2	51	0.00131	LOC650157
rs738704	2	52	0.00132
rs12478644	2	52	0.00132	MYT1L
rs798428	9	15	0.00134
rs3935507	9	15	0.00134
rs1995549	11	20	0.00137	WWOX
rs6703267	11	20	0.00137	C1orf162
rs13102607	11	20	0.00137	ARFIP1
rs243308	10	18	0.00138	NPAS3
rs8060135	10	18	0.00138
rs11218589	10	18	0.00138	CNTN5
rs16950728	8	16	0.00139
rs1506223	5	5	0.0014
rs1664248	5	5	0.0014
rs2476513	5	5	0.0014
rs2660739	5	5	0.0014	ROBO1
rs3811600	5	5	0.0014	ASAP2
rs4737297	5	5	0.0014	XKR4
rs4806152	5	5	0.0014
rs4874100	5	5	0.0014	SCRIB
rs4980001	5	5	0.0014
rs6105333	5	5	0.0014	SIRPD
rs7515572	5	5	0.0014
rs7983908	5	5	0.0014	MYO16
rs13189018	5	5	0.0014
rs13267880	5	5	0.0014	SNTB1
rs17152191	5	5	0.0014	RELN
rs17476650	5	5	0.0014
rs17624592	5	5	0.0014	NRG1
rs2958654	14	31	0.00142	FAM83F
rs1511951	8	14	0.00142	CGNL1
rs13131868	11	21	0.00143
rs4234805	7	8	0.00143	PSAPL1
rs10823406	7	8	0.00143
rs2112556	13	30	0.00145	WWC1
rs4689967	16	43	0.00146
rs1212199	17	47	0.00148
rs8007427	13	25	0.00148	SLC25A29
rs4364205	16	41	0.00149
rs10212653	0	40	0.00149
rs4438287	15	38	0.0015
rs6531100	9	14	0.00151
rs6935686	9	14	0.00151	ITPR3
rs7019162	10	17	0.00154
rs10486632	10	17	0.00154	BMPER
rs11947200	12	23	0.00158
rs152726	0	41	0.00159	MYO10
rs626163	4	3	0.00162	IGDCC3
rs1014184	4	3	0.00162	THSD7A
rs1450631	4	3	0.00162
rs1469243	4	3	0.00162	PDGFC
rs1969852	4	3	0.00162
rs2486884	4	3	0.00162
rs3742885	4	3	0.00162	ZFYVE26
rs3772589	4	3	0.00162	CPB1
rs3892913	4	3	0.00162
rs4816145	4	3	0.00162	C20orf103
rs4861040	4	3	0.00162
rs6834031	4	3	0.00162
rs6992139	4	3	0.00162	KIAA0146
rs7939422	4	3	0.00162
rs8131129	4	3	0.00162
rs11065270	4	3	0.00162	UNQ1887
rs11779314	4	3	0.00162
rs16928562	4	3	0.00162
rs17144509	4	3	0.00162	A2BP1
rs3751723	14	36	0.00163	IRX3
rs2662242	17	48	0.00166	XRCC4
rs10027676	11	22	0.00166
rs7657506	0	34	0.00166
rs10888744	1	43	0.00167	RAB3B
rs1980004	12	26	0.00167
rs194753	9	18	0.00168
rs4704705	8	13	0.0017	RASGRF2
rs4745367	8	13	0.0017
rs12050350	8	13	0.0017	TSHR
rs6080181	10	20	0.00171
rs523583	15	41	0.00175	CD248
rs1452138	17	46	0.00175	CCDC81
rs9571674	2	54	0.00177
rs8101952	14	33	0.00181
rs911228	13	31	0.00182	ATP1A4
rs4601099	5	4	0.00182
rs6883409	5	4	0.00182	RGNEF
rs12612083	5	4	0.00182
rs2515050	2	53	0.00182	SAMD12
rs3741603	12	23	0.00184	HELB
rs210662	13	28	0.00184
rs2218862	1	45	0.00184
rs2829332	11	21	0.00185
rs9375249	11	21	0.00185	TRDN
rs10977709	0	38	0.00185	PTPRD
rs2031818	18	49	0.00185
rs7987249	7	11	0.00186
rs390155	3	63	0.00186	NTM
rs1051992	15	53	0.00189	PRKCDBP
rs1251531	1	46	0.00189	MSH4
rs1419956	13	33	0.00193	PID1
rs1507806	8	12	0.00194
rs11857841	8	12	0.00194	TM2D3
rs12239576	8	12	0.00194
rs12894167	8	12	0.00194
rs729254	6	8	0.00195	OFCC1
rs934781	6	8	0.00195	LOC728800
rs10438534	6	8	0.00195	GSG1L
rs10992886	6	8	0.00195
rs11767782	6	8	0.00195
rs12243555	6	8	0.00195
rs13215966	6	8	0.00195	KRT18P50
rs13345965	6	8	0.00195	JAK3
rs17021971	6	8	0.00195
rs17499587	6	8	0.00195	C15orf41
rs474247	10	19	0.00195	TNFRSF1B
rs3847810	10	19	0.00195	PLXNC1
rs7492215	10	19	0.00195
rs9853501	10	19	0.00195	RTP4
rs17005295	10	19	0.00195	GLI2
rs923381	11	24	0.00197
rs4559484	11	24	0.00197
rs4908830	0	35	0.00197	H6PD
rs6863555	11	20	0.002
rs12549502	0	39	0.002	CSMD3
rs2297172	9	16	0.00201	PTAR1
rs11857807	9	16	0.00201
rs7175105	3	67	0.00203	WDR72
rs2635190	1	54	0.00206
rs6444074	17	50	0.00208	LIPH
rs2183631	3	57	0.00212
rs11076081	3	57	0.00212
rs7342729	0	40	0.00212
rs6940128	8	11	0.00213
rs543967	4	65	0.00214	CCNC
rs8021677	12	27	0.00216
rs752625	14	34	0.0022
rs869035	7	10	0.0022
rs6563005	7	10	0.0022
rs12033929	7	10	0.0022	IGSF21
rs12598524	7	10	0.0022
rs17125401	7	10	0.0022	CSRNP2
rs17197427	16	46	0.0022	SH3RF3
rs4140566	11	23	0.00224	KLHL32
rs7014142	11	23	0.00224
rs11938651	13	32	0.00227
rs2462566	18	51	0.00229	DGKB
rs1330104	16	44	0.0023
rs2124508	3	55	0.0023	MYLK
rs6460015	4	2	0.0023
rs17645317	4	2	0.0023	SPOP
rs524715	17	51	0.00231
rs8042057	14	36	0.00233	C15orf41
rs2195851	6	7	0.00234	RTKN2
rs10810113	6	7	0.00234	NFIB
rs11036882	6	7	0.00234
rs12530590	6	7	0.00234
rs4700177	2	54	0.00235
rs340046	15	43	0.00239	PRELID2
rs1433354	12	26	0.00241	WNT7A
rs3887227	12	26	0.00241
rs4404061	12	26	0.00241
rs4934826	12	26	0.00241
rs10805209	12	26	0.00241
rs1034240	3	53	0.00241
rs1265408	5	2	0.00242	AFF2
rs6453251	3	51	0.00242	F2RL1
rs12109774	12	29	0.00242	PDE4D
rs9607449	15	39	0.00243
rs3812605	14	33	0.00244	NOTCH1
rs2473572	15	41	0.00246	LRFN2
rs1327798	7	9	0.00247
rs1909694	7	9	0.00247	C10orf11
rs7126852	7	9	0.00247	SLC17A6
rs11739301	7	9	0.00247
rs662356	17	49	0.0025
rs4878784	18	52	0.00253
rs7459304	4	66	0.00253
rs2075516	17	52	0.00255	MYH11
rs12000024	13	31	0.00258
rs12725536	13	31	0.00258
rs11243016	2	51	0.0026	FARS2
rs9976949	9	18	0.00261
rs2467136	11	25	0.00263
rs17414604	11	25	0.00263	CHRM2
rs7813388	6	7	0.00264	ERI1
rs7657618	6	6	0.00265
rs17019224	6	6	0.00265	NTNG1
rs1400646	0	38	0.00265	STK39
rs16839969	11	21	0.00265
rs7219901	14	35	0.00265	TMEM11
rs756152	13	27	0.00265
rs16895338	2	48	0.00266
rs1919060	7	8	0.00267
rs944887	8	15	0.00269
rs4887399	8	14	0.00272	NTRK3
rs6588477	8	14	0.00272
rs7961192	8	14	0.00272	TMEM132D
rs8031439	8	14	0.00272
rs842760	10	20	0.00272
rs1152490	10	20	0.00272
rs11633443	10	20	0.00272
rs17081294	12	28	0.00277	MAN1A1
rs2294825	4	62	0.00278
rs2830594	11	20	0.00279
rs445739	4	65	0.00279
rs759433	17	50	0.00279
rs191061	14	37	0.0028
rs17411335	13	33	0.00281
rs10918942	14	39	0.00284
rs6818354	15	40	0.00285
rs7583409	15	40	0.00285	DNMT3A
rs12138053	15	40	0.00285	LAMC1
rs7133323	13	30	0.00285
rs9520960	13	30	0.00285	MYO16
rs11095207	10	15	0.00288
rs1520342	1	36	0.0029
rs3744734	14	34	0.00294	VPS53
rs1441237	9	17	0.00295	CNGB3
rs2159010	9	17	0.00295
rs6790078	9	17	0.00295	CMTM7
rs9922289	9	17	0.00295
rs12085982	9	17	0.00295
rs4826724	11	18	0.00296
rs1744061	11	24	0.00297	IL20RA
rs6988174	11	24	0.00297
rs9725311	11	24	0.00297	IGSF21
rs12932768	11	24	0.00297	A2BP1
rs3779771	10	19	0.00297	ZFPM2
rs10199796	10	19	0.00297	DPP10
rs970447	16	46	0.003
rs2269951	16	46	0.003	FAM53C
rs29826	3	56	0.00302
rs10741150	4	64	0.00307	DOCK1
rs7773598	12	27	0.00307
rs17105337	12	27	0.00307
rs3744374	12	30	0.00309	GAS2L2
rs10904392	17	51	0.00311
rs12847820	7	7	0.00314
rs10942061	17	51	0.00315	CDH10
rs3010291	10	18	0.00317	hCG_1786283
rs4814080	1	41	0.00317
rs12229259	10	18	0.00317
rs354883	14	36	0.00319	STAP1
rs6632528	10	16	0.00319	FIGF
rs4887320	15	39	0.0032
rs4844657	9	16	0.00323	PLXNA2
rs7144034	9	16	0.00323
rs9547837	9	16	0.00323
rs13156828	9	16	0.00323
rs920750	4	60	0.00323	ABR
rs11061461	4	60	0.00323
rs12963499	0	36	0.00324
rs16966394	11	23	0.00324
rs1411200	7	12	0.00325
rs2547039	7	12	0.00325	SLC5A11
rs5752592	7	12	0.00325
rs4790102	17	47	0.00328	GARNL4
rs7025303	3	54	0.0033	SHB
rs1805964	15	43	0.00334	SEMA5A
rs744994	14	38	0.00335
rs6712327	14	38	0.00335
rs1642040	10	22	0.00335	ACACB
rs9553061	10	22	0.00335	MIPEP
rs12414155	4	63	0.00336
rs221178	5	6	0.00338	CPVL
rs665670	5	6	0.00338
rs2827450	5	6	0.00338
rs2964436	5	6	0.00338	ADAMTS16
rs3936120	5	6	0.00338
rs6706361	5	6	0.00338
rs6874335	5	6	0.00338
rs6880063	5	6	0.00338
rs8041622	5	6	0.00338	ANPEP
rs9544930	5	6	0.00338	NBEA
rs10409516	5	6	0.00338	INSR
rs10516998	5	6	0.00338	APBB2
rs12151367	5	6	0.00338
rs17146355	5	6	0.00338	RAPGEF5
rs35297838	5	6	0.00338
rs2477912	16	43	0.0034	RAB20
rs615986	16	47	0.00341
rs1159987	8	11	0.00342
rs6633021	8	11	0.00342
rs7785035	9	15	0.00344	tcag7.1023
rs7168817	8	13	0.00345	PCSK6
rs4110508	4	59	0.00346
rs12324805	1	45	0.00346
rs2220486	13	34	0.00346	TMEM132C
rs2876643	13	34	0.00346	HDGFL1
rs1385331	2	51	0.00346
rs1580141	2	51	0.00346
rs1513115	11	22	0.00346
rs9644757	11	22	0.00346
rs178501	16	45	0.00347	ACCSL
rs10497338	16	45	0.00347	STK39
rs12610082	0	33	0.00348	PTPRS
rs407439	5	7	0.00349
rs987284	3	58	0.00349	NDFIP2
rs12457257	13	31	0.00351	FHOD3
rs419030	12	29	0.00352
rs3742076	12	27	0.00357	FOXM1
rs4246894	5	62	0.00362	LOC169834
rs594397	0	38	0.00363	SLC25A24
rs10818094	2	46	0.00367
rs12879135	8	16	0.00368
rs4904488	2	47	0.0037
rs2143613	7	11	0.0037	VAPB
rs2303644	7	11	0.0037	ADAMTS2
rs6076248	7	11	0.0037	TMEM90B
rs7254212	7	11	0.0037	ZNF264
rs11040914	7	11	0.0037
rs1023421	16	42	0.00373	ATP1A2
rs1795302	10	21	0.00373
rs6118687	1	38	0.00373	PAK7
rs10751067	10	21	0.00373
rs16977678	10	21	0.00373
rs2400171	15	40	0.00374
rs6465641	15	40	0.00374
rs10498043	15	40	0.00374
rs4951329	0	39	0.00375	PLEKHA6
rs4149597	15	37	0.00378	NEDD4L
rs1816028	6	9	0.00379
rs4906255	6	9	0.00379	RCOR1
rs9492955	6	9	0.00379
rs12600910	6	9	0.00379	ANKFN1
rs472589	9	19	0.0038	LOC647163
rs882953	9	19	0.0038	KIAA0774
rs7543864	9	19	0.0038
rs1432286	14	37	0.00381	NCKAP5
rs1433251	14	37	0.00381
rs12149061	16	48	0.00386
rs6693489	15	44	0.00387
rs17770213	15	44	0.00387	AFAP1
rs455600	12	28	0.00388	FAT1
rs13162633	11	25	0.00389	GRAMD3
rs7751526	5	61	0.0039	SIM1
rs6761961	4	64	0.0039	TRA2B
rs6575086	13	33	0.00391
rs4801163	3	56	0.00397	ZNF667
rs9930924	4	61	0.00397
rs1229377	5	5	0.00402	RCSD1
rs1900121	5	5	0.00402	C14orf118
rs1958654	5	5	0.00402
rs4722158	5	5	0.00402
rs6469569	5	5	0.00402
rs8008719	5	5	0.00402
rs11191274	5	5	0.00402	GBF1
rs11682049	5	5	0.00402
rs11700855	5	5	0.00402
rs12522630	5	5	0.00402
rs317881	10	20	0.00403
rs8038712	1	39	0.00403
rs12708807	10	20	0.00403
rs8036227	7	10	0.00404
rs34337761	7	10	0.00404
rs6881592	4	56	0.00407
rs974843	3	59	0.00411	CLCA4
rs17292175	3	59	0.00411	RPA1
rs882169	17	49	0.00414
rs4511139	8	15	0.00417	USH2A
rs6752623	8	15	0.00417
rs12627037	8	15	0.00417
rs6856236	12	27	0.00418	D4S234E
rs3757247	5	64	0.00419	BACH2
rs619208	3	55	0.0042
rs1253439	3	55	0.0042	SYT12
rs11582732	3	55	0.0042	PTCHD2
rs1984069	14	36	0.00421	PRDM16
rs321775	11	24	0.00422	ANKRD55
rs2200537	11	24	0.00422
rs1353887	9	18	0.00423
rs4077747	9	18	0.00423	SAMD12
rs6902294	9	18	0.00423
rs7625382	9	18	0.00423
rs10997316	2	41	0.00423	CTNNA3
rs11591777	9	18	0.00423
rs7121897	10	19	0.00426	NTM
rs7171433	10	19	0.00426
rs9521941	1	40	0.00426
rs6037988	2	52	0.00427
rs1357869	4	63	0.00428	DGKB
rs2355351	4	63	0.00428	MYO3B
rs290726	13	32	0.00429
rs9300911	13	32	0.00429
rs4656923	4	60	0.0043
rs13008832	4	60	0.0043
rs1568421	6	8	0.00433
rs2298235	6	8	0.00433	OLFM4
rs2739726	6	8	0.00433
rs10884947	6	8	0.00433
rs11126453	6	8	0.00433	TACR1
rs11913427	6	8	0.00433	SLC2A11
rs11937761	6	8	0.00433	SPATA5
rs12124529	6	8	0.00433	PLEKHA6
rs2248842	2	54	0.00433
rs12716865	16	49	0.00435	WWOX
rs329037	15	41	0.00436	GRM7
rs10202702	15	41	0.00436
rs10521220	3	54	0.00441
rs11958956	3	54	0.00441	PDE4D
rs7047061	10	24	0.00441
rs4261975	3	58	0.00442
rs2296262	12	30	0.00443	DFNB31
rs5769415	10	35	0.00444
rs9787335	16	45	0.00445
rs5906709	5	4	0.00448	GATA1
rs282268	11	23	0.00448	SERPINE2
rs7919639	11	23	0.00448
rs2136521	15	43	0.0045
rs6869207	15	43	0.0045
rs10425074	10	17	0.00451	LOC100130419
rs17067759	17	52	0.00451
rs4667959	11	27	0.00455
rs4795180	0	32	0.00455	ACACA
rs13272719	0	32	0.00455	CYP7B1
rs6025606	1	44	0.00455	CTCFL
rs10431415	1	44	0.00455	TMTC2
rs1959362	1	43	0.00455
rs11658342	1	43	0.00455	SERPINF1
rs11900847	14	35	0.00455
rs2027203	9	17	0.00456
rs2361832	9	17	0.00456	IL1RAP
rs11200385	9	17	0.00456	TACC2
rs12001916	9	17	0.00456	UGCG
rs28522311	9	17	0.00456
rs2387333	10	23	0.00456	NCALD
rs2418326	10	23	0.00456	TNFSF8
rs6429661	10	23	0.00456
rs11025138	10	23	0.00456
rs16886349	10	23	0.00456
rs10788478	13	31	0.00461	GRID1
rs4424129	4	59	0.00462
rs16899146	11	34	0.00463
rs1835818	11	22	0.00467	NCKAP5
rs11700358	0	37	0.00467
rs936198	15	37	0.00467	SR140
rs7195386	4	62	0.00468	RBBP6
rs12471785	4	62	0.00468
rs2403511	6	7	0.0047	GALNTL4
rs793034	14	40	0.00472
rs1495271	3	57	0.00475	PCSK6
rs6094594	9	21	0.00475	EYA2
rs2207667	8	15	0.00476
rs1527754	3	52	0.00479
rs1744356	3	52	0.00479
rs731394	2	49	0.0048
rs2297630	9	16	0.0048	CXCL12
rs2404175	8	13	0.00483	BIN1
rs13021034	8	13	0.00483
rs17720036	8	13	0.00483
rs13261568	14	34	0.00484	FAM135B
rs12368065	4	64	0.00486	RBMS2
rs4569679	12	29	0.00486
rs7376535	13	30	0.00487	LOC285484
rs748548	16	44	0.00489	TMEM132B
rs7785365	16	50	0.00489
rs153703	12	32	0.00492
rs15884	3	51	0.00494
rs163803	4	4	0.00494	CTSZ
rs314721	4	4	0.00494	CNTNAP5
rs464017	4	4	0.00494	GSPT1
rs892143	4	4	0.00494	CYP4F22
rs969928	4	4	0.00494	SRPX
rs1492809	4	4	0.00494
rs2107526	4	4	0.00494	FBXL14
rs2246165	4	4	0.00494	NRG3
rs2825336	4	4	0.00494
rs3118426	4	4	0.00494	RPE65
rs4239171	4	4	0.00494
rs4606068	4	4	0.00494
rs4683235	4	4	0.00494	LTF
rs4867609	4	4	0.00494	KCNIP1
rs6596813	4	4	0.00494
rs6810785	4	4	0.00494
rs6862736	4	4	0.00494
rs6973301	4	4	0.00494	DPP6
rs7328026	4	4	0.00494	C13orf28
rs7495535	4	4	0.00494
rs7590488	4	4	0.00494
rs9313435	4	4	0.00494	SLIT3
rs9544117	4	4	0.00494
rs10144271	4	4	0.00494	TDRD9
rs10833162	4	4	0.00494	NAV2
rs11926561	4	4	0.00494
rs12578500	4	4	0.00494	ANO2
rs12849558	4	4	0.00494	MID1
rs12863905	4	4	0.00494
rs16837803	4	4	0.00494
rs17057001	4	4	0.00494	DIAPH3
rs17062468	4	4	0.00494
rs17073437	4	4	0.00494
rs17099987	6	6	0.00494	NPAS3
rs17825174	6	6	0.00494	ABCC11
rs41274260	6	6	0.00494	FOXE1
rs12879855	4	58	0.00495
rs7744688	2	44	0.00496
rs7975809	5	65	0.005
rs9526445	14	37	0.005	MED4
rs7342347	8	12	0.005
rs7972769	12	32	0.00502
rs801259	10	22	0.00503
rs11780016	10	22	0.00503
rs1869	11	26	0.00504	KIAA1967
rs1645685	11	26	0.00504
rs4520167	11	26	0.00504	LOC100129150
rs4632732	11	26	0.00504
rs6548010	11	26	0.00504	APOB
rs9887650	9	13	0.00505	DMD
rs26971	3	2	0.00506
rs317722	3	2	0.00506	CPVL
rs680359	3	2	0.00506
rs812650	3	2	0.00506
rs990712	3	2	0.00506
rs1061258	3	2	0.00506	NEK7
rs1120331	3	2	0.00506	DGKB
rs1868209	3	2	0.00506
rs2306520	3	2	0.00506
rs2403733	3	2	0.00506
rs3127389	3	2	0.00506
rs4806637	3	2	0.00506	RDH13
rs5028180	3	2	0.00506
rs6499604	3	2	0.00506	ZFHX3
rs6514113	3	2	0.00506	PSMF1
rs6776457	3	2	0.00506
rs6897035	3	2	0.00506
rs7713591	3	2	0.00506	FER
rs7757915	3	2	0.00506
rs9320971	3	2	0.00506	NKAIN2
rs9401948	3	2	0.00506	RNF146
rs9809942	3	2	0.00506	RBMS3
rs9962891	3	2	0.00506
rs10200778	3	2	0.00506
rs10520991	3	2	0.00506	PDZD2
rs10955606	3	2	0.00506
rs11117278	3	2	0.00506	ZCCHC14
rs12522738	3	2	0.00506
rs12543712	3	2	0.00506
rs12594522	3	2	0.00506	FMN1
rs12605373	3	2	0.00506
rs12894660	3	2	0.00506
rs13426125	3	2	0.00506
rs16837606	3	2	0.00506
rs16893696	3	2	0.00506	ADAMTS6
rs17104863	3	2	0.00506	RAD51L1
rs17169472	3	2	0.00506	hCG_1745121
rs17430552	3	2	0.00506
rs17728780	3	2	0.00506
rs17883082	3	2	0.00506
rs34219737	3	2	0.00506
rs17781702	15	42	0.00506	ANAPC10
rs2829432	16	46	0.00506
rs10181110	16	46	0.00506	FRZB
rs4902620	7	12	0.00507
rs11097358	3	56	0.00507	GRID2
rs417825	3	59	0.00507
rs4879795	3	49	0.0051	DNAI1
rs4607517	10	22	0.0051	GCK
rs10791241	15	46	0.00512	OPCML
rs11157721	13	36	0.00514
rs10827940	15	39	0.00514	PLXDC2
rs2015241	0	30	0.00516	LOC650794
rs35089016	8	14	0.00517
rs2973319	15	44	0.0052	ADCY2
rs1447698	9	17	0.0052
rs9376667	12	28	0.00522
rs9903880	12	28	0.00522
rs9544834	13	33	0.00522
rs11150186	13	33	0.00522
rs11900136	17	52	0.00526
rs10918196	14	38	0.00528
rs893949	4	57	0.00528
rs7101596	2	52	0.00534	PARVA
rs9512421	2	52	0.00534
rs918921	14	39	0.00536
rs293340	7	13	0.00537
rs7933597	7	13	0.00537	DLG2
rs7993948	7	13	0.00537	USP12
rs10805294	7	13	0.00537
rs1839063	10	21	0.00538	OSBPL11
rs3778333	10	21	0.00538	SSR1
rs9371790	10	21	0.00538	IPCEF1
rs16895822	10	21	0.00538
rs7708242	10	27	0.0054
rs12183240	14	36	0.0054	SCGN
rs2246589	9	20	0.00541
rs2289428	9	20	0.00541	KALRN
rs9695734	9	20	0.00541	PHF2
rs11496038	9	20	0.00541	TNS3
rs9840100	11	25	0.00543	SCHIP1
rs10059334	11	25	0.00543
rs10425059	0	34	0.00543
rs11132507	11	25	0.00543
rs11733360	0	34	0.00543	SORCS2
rs2340594	4	4	0.00546	PLEKHN1
rs4957639	4	4	0.00546	EPB41L4A
rs17154020	4	4	0.00546	ZNF485
rs1607970	5	64	0.00551
rs4976121	5	64	0.00551
rs12498292	5	64	0.00551
rs2033691	12	31	0.00554
rs4774658	4	60	0.00554
rs9521936	4	60	0.00554
rs1472036	15	41	0.00555
rs2588681	15	41	0.00555
rs3749759	15	41	0.00555	ARAP3
rs7126169	14	41	0.00556	LOC645490
rs6001749	13	32	0.00559	TNRC6B
rs6662382	13	32	0.00559	OR10T2
rs6726347	13	32	0.00559
rs1857682	8	17	0.0056
rs3895368	8	17	0.0056	CAPN9
rs10921206	8	17	0.0056
rs317397	10	20	0.00564	ACCN1
rs886159	10	20	0.00564
rs2296030	12	26	0.00569
rs9360588	3	54	0.00572	KCNQ5
rs10214316	3	54	0.00572	ANKRD55
rs12590590	3	54	0.00572	ERO1L
rs497758	16	49	0.00573	FRS2
rs185885	11	24	0.00574	FARP1
rs2272756	11	24	0.00574	NOC2L
rs7741907	11	24	0.00574
rs5950751	16	47	0.00574
rs1890376	17	52	0.00575
rs4893900	17	52	0.00575
rs7514302	17	52	0.00575
rs10518725	10	19	0.00582	WDR72
rs13359820	0	26	0.00583	PCDHGA2
rs1181729	0	31	0.00587	LOC100131199
rs3734533	0	31	0.00587	HIST1H4F
rs10165323	0	31	0.00587
rs328181	1	41	0.00591
rs3897737	1	41	0.00591	CNTN4
rs10037346	1	41	0.00591	LOC644100
rs2839094	14	38	0.00591
rs4074023	14	38	0.00591	TBC1D16
rs6892417	14	38	0.00591
rs237206	9	19	0.00593
rs3846710	9	19	0.00593	SLC36A2
rs7898793	9	19	0.00593	LHPP
rs9523792	9	19	0.00593	GPC5
rs17778070	9	19	0.00593
rs1395451	7	12	0.00594
rs1534002	7	12	0.00594
rs2172326	7	12	0.00594	TMEM132D
rs6693689	7	12	0.00594
rs7732687	7	12	0.00594	EPB41L4A
rs10085098	7	12	0.00594
rs10483440	7	12	0.00594	NPAS3
rs10510751	7	12	0.00594
rs11821612	7	12	0.00594
rs12110525	7	12	0.00594
rs16918323	7	12	0.00594	RP11-49L2.2
rs13221935	11	23	0.00595	SLC13A1
rs11122177	4	59	0.00599	ARV1
rs497847	3	53	0.00603	LSM12
rs2684788	3	53	0.00603	IGF1R
rs2838070	3	53	0.00603
rs2921184	4	3	0.00603	C6
rs6428791	4	3	0.00603	WARS2
rs7131031	4	3	0.00603
rs7183492	4	3	0.00603	C15orf27
rs7576163	4	3	0.00603	GALNT13
rs11663490	4	3	0.00603	LOC284215
rs16959157	4	3	0.00603
rs16990116	4	3	0.00603	DMD
rs2826350	12	30	0.00605
rs4777488	12	30	0.00605	ZNF609
rs11752646	12	30	0.00605	FUT9
rs9557934	3	2	0.00606	BIVM
rs17318292	15	50	0.00608	GRID1
rs17831845	1	35	0.00613	MED10
rs2074430	2	49	0.00613	HNF1B
rs13254009	10	21	0.00616	TRAPPC9
rs4141069	11	20	0.00617
rs2237182	8	16	0.00621	ATXN1
rs6873550	8	16	0.00621	ZNF608
rs6486512	5	59	0.00628
rs10800364	5	59	0.00628
rs2163654	13	34	0.00631	NCKAP5
rs12648879	13	34	0.00631
rs2272674	14	40	0.00632	ST3GAL1
rs12922080	9	18	0.00632
rs1347653	7	11	0.00633
rs1386938	7	11	0.00633
rs2257389	7	11	0.00633	DIMT1L
rs2756919	7	11	0.00633
rs4673085	7	11	0.00633	SERPINE2
rs6911698	7	11	0.00633
rs6998193	7	11	0.00633	GOLGA7
rs16931326	7	11	0.00633	BHLHE22
rs1440095	3	56	0.00633	SGK493
rs10885634	3	56	0.00633	TRUB1
rs12230584	2	48	0.00636	FRS2
rs12476864	2	48	0.00636
rs772788	4	61	0.00639
rs458552	17	51	0.00642	RCL1
rs292672	15	42	0.00642
rs7595947	13	39	0.00643
rs17541760	16	50	0.00645
rs2390409	4	58	0.00646
rs1357858	0	32	0.00646	DGKB
rs1368772	11	27	0.00646	ADAMTSL1
rs7303562	0	32	0.00646	FAR2
rs28855694	0	32	0.00646	SNTB1
rs4798363	2	47	0.00654	EPB41L3
rs7585694	2	47	0.00654
rs1884393	7	10	0.00656	SIRPB2
rs3195954	7	10	0.00656	RSBN1
rs10835646	7	10	0.00656	C11orf46
rs11640268	7	10	0.00656
rs2977702	2	42	0.00658
rs7508584	9	17	0.00658
rs9889775	2	42	0.00658
rs17665171	9	17	0.00658	A2BP1
rs1881969	3	51	0.00659
rs1994624	3	51	0.00659	NR3C2
rs4354346	7	20	0.00662
rs4806857	11	30	0.00665
rs7177948	0	29	0.00665
rs5955796	7	8	0.00666
rs6941421	4	51	0.00666
rs895040	8	15	0.00666	ENOX1
rs1590057	8	15	0.00666
rs1680733	8	15	0.00666
rs4961400	8	15	0.00666
rs7301081	8	15	0.00666	TMEM132B
rs11587479	8	15	0.00666	CAMTA1
rs13060295	8	15	0.00666	MAP3K13
rs17562787	8	15	0.00666	LRRC68
rs17566909	8	15	0.00666
rs1180939	10	23	0.00668	PARS2
rs2796787	1	36	0.00668
rs11602745	10	23	0.00668
rs11725922	10	23	0.00668	STAP1
rs2127077	2	46	0.00669
rs11598654	4	7	0.00669	C10orf118
rs7496544	15	51	0.00669
rs6917508	2	43	0.00674
rs207331	15	44	0.00674
rs870087	13	33	0.00674	NRP1
rs2717	16	53	0.00676	VTA1
rs1991231	3	55	0.00677
rs2206327	4	2	0.00677
rs2428596	4	2	0.00677	MID1
rs5956696	4	2	0.00677	ODZ1
rs10087719	12	28	0.00677
rs9981608	2	45	0.00677
rs510626	6	10	0.0068
rs1554367	6	10	0.0068	NELL1
rs2026018	6	10	0.0068
rs2236026	6	10	0.0068	KIAA0408
rs2492654	6	10	0.0068
rs4671871	6	10	0.0068	C1D
rs4931615	6	10	0.0068	BICD1
rs6488810	2	44	0.0068	DERA
rs9310212	6	10	0.0068	FOXP1
rs12416718	6	10	0.0068	RPUSD4
rs17719229	6	10	0.0068
rs1459959	3	50	0.00682
rs7256689	16	45	0.00683	MYO9B
rs11063723	16	45	0.00683
rs10954569	15	46	0.00686
rs3781926	12	32	0.00687	PDE2A
rs4075798	15	41	0.0069
rs718099	0	33	0.00692	DSCAM
rs1894910	11	26	0.00692
rs2797136	11	26	0.00692
rs4865590	11	26	0.00692
rs1976495	4	57	0.00693
rs7670905	13	36	0.00696	LOC100132013
rs13165241	8	14	0.00696	UBTD2
rs16963074	8	14	0.00696	KCNG4
rs17157831	8	14	0.00696
rs35036423	8	14	0.00696
rs4363051	14	39	0.00696	NKAIN2
rs4821633	14	39	0.00696
rs2236018	3	49	0.00701	TBX5
rs312456	5	7	0.00705	SLC16A13
rs531790	5	7	0.00705
rs711080	5	7	0.00705
rs941445	5	7	0.00705	RAI1
rs1011642	5	7	0.00705
rs1782783	5	7	0.00705
rs4093501	5	7	0.00705	ZNF365
rs4254724	5	7	0.00705
rs4926528	5	7	0.00705	AGBL4
rs6687878	5	7	0.00705
rs7069192	5	7	0.00705	TAF3
rs7224811	5	7	0.00705
rs7536844	5	7	0.00705
rs8112673	5	7	0.00705
rs9588091	5	7	0.00705
rs9988803	5	7	0.00705	DLG2
rs11032896	5	7	0.00705	TRIM68
rs12698189	5	7	0.00705	PTPRN2
rs13118489	5	7	0.00705
rs16823052	5	7	0.00705	OSCP1
rs16832858	5	7	0.00705
rs16985720	5	7	0.00705
rs17142789	5	7	0.00705
rs507395	3	1	0.00708
rs7877192	3	1	0.00708	FIGF
rs10500970	3	1	0.00708
rs10831827	7	11	0.00709	PARVA
rs439513	1	37	0.00709
rs530067	10	22	0.00709
rs568995	10	22	0.00709
rs1179714	10	22	0.00709
rs7542194	10	22	0.00709
rs6591348	8	13	0.00712	GAL
rs11772826	3	48	0.00713
rs10810702	12	26	0.00714
rs4378760	3	57	0.00719	WIPF1
rs587059	3	54	0.00721
rs11064855	5	61	0.00724	LOC387890
rs7704404	0	27	0.00726
rs6447662	11	25	0.00727	FRYL
rs6535843	0	34	0.00727
rs2838416	16	49	0.00733
rs797225	13	31	0.00734	STARD13
rs2072794	1	38	0.00738	KDELR3
rs2146103	10	21	0.00738	YY1
rs4857401	10	21	0.00738
rs7456406	10	21	0.00738
rs1202584	14	41	0.00741	C1orf198
rs574322	6	9	0.00744	NTM
rs847189	6	9	0.00744
rs1027263	6	9	0.00744
rs6124611	6	9	0.00744	TOX2
rs6563031	6	9	0.00744	EDNRB
rs6601276	6	9	0.00744
rs7330745	6	9	0.00744	LRCH1
rs7662981	6	9	0.00744
rs9490584	6	9	0.00744
rs9887131	6	9	0.00744
rs10152238	6	9	0.00744	LOC100130857
rs11627551	6	9	0.00744
rs17783015	6	9	0.00744
rs35294772	6	9	0.00744
rs1533622	12	31	0.00747
rs4362930	12	31	0.00747	ABLIM3
rs6067996	16	50	0.0075
rs250710	0	30	0.00751	KCNMA1
rs913807	0	30	0.00751
rs1564571	11	29	0.00751	CSMD1
rs2289445	0	30	0.00751
rs2306181	11	24	0.00751	DERA
rs6109329	11	24	0.00751
rs12466400	0	25	0.00751	FAM179A
rs1812576	2	38	0.00754	RLBP1L1
rs881982	1	39	0.00756	CCBE1
rs1929756	1	39	0.00756
rs9593339	1	39	0.00756
rs10890655	1	39	0.00756
rs3935665	15	49	0.00756	HHAT
rs6624037	10	17	0.00757
rs488797	13	35	0.00758	BRUNOL4
rs10125737	13	35	0.00758
rs10928926	13	35	0.00758
rs17245314	12	34	0.00759	ASCC3
rs1724422	14	42	0.00759
rs1943186	1	41	0.00764
rs557214	1	40	0.00764	APCDD1
rs345515	3	53	0.00766	FRAS1
rs6990777	3	53	0.00766
rs2842126	14	35	0.00766
rs5977184	11	21	0.0077
rs6541247	0	28	0.00771	TTC13
rs2402350	15	45	0.00774
rs11140865	15	45	0.00774
rs12999687	3	56	0.00774	DNMT3A
rs2277251	5	63	0.00776
rs4905376	5	63	0.00776	TCL1B
rs7503424	5	63	0.00776	C17orf101
rs762415	15	47	0.00783
rs2035906	15	47	0.00783
rs1291352	6	8	0.00784
rs6013355	6	8	0.00784
rs6674639	6	8	0.00784	TMCO1
rs8004587	6	8	0.00784
rs11166863	6	8	0.00784
rs11606448	6	8	0.00784	ADAMTS8
rs10037310	5	7	0.00784
rs2069013	5	6	0.00785	CDKAL1
rs2304593	5	6	0.00785	CMTM7
rs2523961	5	6	0.00785	PPP1R11
rs3027852	5	6	0.00785	HTATSF1
rs3798603	5	6	0.00785	MAN1A1
rs4128352	5	6	0.00785
rs7008775	5	6	0.00785
rs10260159	5	6	0.00785
rs11235141	5	6	0.00785
rs12720356	5	6	0.00785	TYK2
rs13189284	5	6	0.00785	C5orf56
rs17643262	5	6	0.00785	LRRC68
rs1510213	4	55	0.00786
rs6942413	4	55	0.00786
rs6546594	5	60	0.00786
rs9824509	5	65	0.00792
rs1380706	12	30	0.00794
rs3760122	12	30	0.00794	TPSAB1
rs7925175	12	30	0.00794	KIRREL3
rs9433610	12	30	0.00794
rs9931509	2	48	0.00799	SNAI3
rs11528742	4	55	0.008
rs5905526	6	7	0.00803
rs7614084	5	53	0.00806	ROBO1
rs6877519	13	34	0.00809
rs2247308	10	22	0.00809	PANK4
rs657030	3	52	0.00809
rs2320102	3	52	0.00809
rs12036795	16	48	0.0081
rs2318346	10	25	0.00811	COL22A1
rs6436508	1	34	0.00811	DOCK10
rs222314	9	20	0.00815
rs4809210	9	20	0.00815
rs10043543	9	20	0.00815
rs13097506	9	20	0.00815
rs1524060	14	40	0.00817
rs1606889	14	40	0.00817
rs12879543	14	40	0.00817	LRP10
rs12989241	14	40	0.00817
rs2786847	4	58	0.00817	C10orf76
rs9425014	4	58	0.00817
rs12228181	4	58	0.00817
rs776798	11	28	0.0082
rs2122728	11	28	0.0082
rs4848692	16	50	0.00824
rs17098939	6	9	0.00829
rs755643	2	47	0.0083
rs1865069	2	47	0.0083	LOC390956
rs4575879	2	47	0.0083	TP63
rs17446916	2	47	0.0083
rs1353452	17	47	0.0083
rs2420699	12	29	0.0083
rs10051599	4	54	0.00831
rs874064	5	5	0.00834	C6orf222
rs7940624	12	33	0.00846
rs4408886	7	14	0.00847
rs4700005	7	14	0.00847
rs2481703	13	33	0.00848
rs8113178	13	33	0.00848
rs7255941	0	28	0.00849
rs8030397	0	28	0.00849	RYR3
rs980171	3	51	0.0085
rs3846250	3	51	0.0085
rs7326323	3	51	0.0085
rs11194306	3	51	0.0085
rs7523061	15	44	0.0085
rs340708	5	62	0.00852	FAM135B
rs3804755	5	62	0.00852	PDIA5
rs8086642	5	62	0.00852
rs10049915	5	62	0.00852	LOC285501
rs7998242	4	61	0.00853
rs4414666	4	60	0.00855
rs4705449	4	60	0.00855	PPP2R2B
rs2509595	12	28	0.00855	DTNA
rs6583176	12	28	0.00855	PAK2
rs17327802	5	4	0.00856
rs1982774	2	46	0.00857
rs12332664	2	46	0.00857	SPOCK1
rs1528736	9	19	0.00859
rs4335989	9	19	0.00859
rs6901049	9	19	0.00859	CITED2
rs7019789	9	19	0.00859	FAM154A
rs7716600	9	19	0.00859
rs10878660	9	19	0.00859
rs12798947	9	19	0.00859	NELL1
rs7012165	14	41	0.0086	NECAB1
rs908241	9	21	0.00862	RPTOR
rs2255992	14	42	0.00866
rs4902307	14	42	0.00866
rs7953192	14	42	0.00866	ZDHHC17
rs8192474	12	27	0.0087	CDK5R1
rs11159076	4	53	0.00872	TMEM90A
rs1919188	11	27	0.00874	CNTNAP2
rs7045641	11	27	0.00874
rs7245985	11	27	0.00874
rs10796217	0	32	0.00874	FAM107B
rs643559	10	24	0.00875	KCND3
rs1037693	1	35	0.00875	EXT1
rs1540667	10	24	0.00875
rs1931023	1	35	0.00875
rs9573140	10	24	0.00875
rs10153410	10	24	0.00875	MYOM1
rs10829346	10	24	0.00875
rs12664698	10	24	0.00875
rs445593	16	47	0.00876
rs4970808	16	47	0.00876	FNDC7
rs7494379	13	32	0.00876	FERMT2
rs425628	5	64	0.00877
rs8012907	5	64	0.00877
rs13155880	15	40	0.00877	TNFAIP8
rs1452040	2	45	0.00879
rs1872445	14	39	0.00879
rs2095904	14	39	0.00879
rs518095	4	57	0.00881
rs7066441	6	7	0.00884
rs25735	9	18	0.00886	FSTL4
rs8033142	9	18	0.00886
rs10939086	2	41	0.00886
rs4859756	3	50	0.00889
rs154972	15	48	0.00891
rs645257	13	39	0.00892
rs1858175	2	44	0.00894
rs603495	8	17	0.00898
rs714291	8	17	0.00898
rs1000443	8	17	0.00898
rs2358398	8	17	0.00898	C10orf112
rs6857356	8	17	0.00898
rs11710912	8	17	0.00898
rs13155995	15	45	0.00899
rs2647981	2	42	0.009
rs13078190	9	17	0.009	FHIT
rs9676881	3	54	0.00902	KEAP1
rs2415484	2	43	0.00902
rs6432187	2	43	0.00902	ROCK2
rs293243	16	49	0.00912	PRKG1
rs1562893	16	49	0.00912
rs1609453	7	13	0.00912	MUC16
rs1667618	7	13	0.00912
rs2463678	7	13	0.00912
rs2797930	7	13	0.00912
rs4622569	7	13	0.00912	LRRC48
rs4800149	7	13	0.00912	CABLES1
rs4964566	7	13	0.00912	BTBD11
rs7255307	7	13	0.00912	SLC27A1
rs10515900	7	13	0.00912
rs10893605	7	13	0.00912	CNTN5
rs12552072	7	13	0.00912
rs12939271	7	13	0.00912
rs13163090	7	13	0.00912
rs2354178	0	33	0.00913
rs6882143	11	26	0.00913
rs12146493	0	33	0.00913	DKFZp761E198
rs16892778	11	26	0.00913	RGS7BP
rs2352737	15	43	0.00914	LOC645177
rs7564482	15	43	0.00914
rs9953857	15	43	0.00914
rs11097730	15	43	0.00914
rs1015667	12	32	0.00916
rs1553847	12	32	0.00916
rs2347704	12	32	0.00916
rs3762144	12	32	0.00916
rs6905808	12	32	0.00916
rs10842103	12	32	0.00916
rs2213607	2	1	0.00917
rs274009	1	43	0.00917	CREB3L2
rs445658	10	23	0.00922	CHL1
rs2291962	10	23	0.00922	KIAA0513
rs2613319	10	23	0.00922
rs4751107	1	36	0.00922	MGMT
rs7575011	1	36	0.00922
rs11881643	10	23	0.00922	ELAVL1
rs4953251	16	51	0.00923	PRKCE
rs6951829	14	38	0.00929
rs10802440	14	38	0.00929
rs1990640	4	59	0.0093	VIT
rs10022899	4	59	0.0093
rs4876500	5	61	0.00933	CSMD3
rs10111470	5	61	0.00933	SGCZ
rs2789370	14	40	0.00945	ARID4B
rs10417520	14	40	0.00945
rs4711724	4	56	0.00946	UBR2
rs4909820	8	16	0.00948
rs7001682	8	16	0.00948
rs1460494	0	29	0.00951	KCNIP4
rs17630697	0	29	0.00951	WDR72
rs6830571	10	21	0.00953
rs1504355	7	12	0.00953
rs2188114	7	12	0.00953	LOC646377
rs4663805	7	12	0.00953	RAMP1
rs6456063	7	12	0.00953
rs10469016	7	12	0.00953	DCC
rs11024350	7	12	0.00953	OTOG
rs11690787	7	12	0.00953	SPATS2L
rs17515034	7	12	0.00953	FGF20
rs4361831	0	35	0.00953	FRMD3
rs4697617	11	24	0.00953	KIAA0746
rs10888844	11	24	0.00953	SSBP3
rs1161539	10	22	0.00953	CSMD1
rs1393672	10	22	0.00953
rs6026894	10	22	0.00953	LOC645605
rs10053232	1	37	0.00953
rs11603556	10	22	0.00953
rs13040152	10	22	0.00953
rs3132117	14	41	0.00954
rs12076947	0	24	0.00958	MUL1
rs164207	1	32	0.00961	CMTM6
rs872808	13	37	0.00965	NKAIN4
rs8078118	17	53	0.00965	TM4SF5
rs4954438	12	31	0.0097
rs7796267	12	31	0.0097	CAMK2B
rs464206	1	38	0.00971
rs1216481	1	38	0.00971
rs4892044	1	38	0.00971	NETO1
rs13317933	1	38	0.00971	FHIT
rs1018603	7	11	0.00972	ERCC6
rs6687825	7	11	0.00972
rs9901969	7	11	0.00972	LYZL6
rs549368	9	19	0.00972
rs13041173	1	40	0.00973	EIF2S2
rs9374827	15	45	0.00974
rs6009945	3	47	0.00975
rs503075	8	15	0.00977
rs2865862	8	15	0.00977
rs10131882	8	15	0.00977
rs10489023	8	15	0.00977
rs11741200	8	15	0.00977	EPB41L4A
rs17530151	8	15	0.00977
rs4884931	5	57	0.00979
rs1501139	2	48	0.00981
rs7145318	2	48	0.00981	KLHL33
rs7659991	16	48	0.00988
rs2833458	3	46	0.00988
rs7982479	8	14	0.0099	NUDT15
rs9750959	8	14	0.0099	SNTG2
rs12010906	8	14	0.0099	DOCK11
rs7025013	16	54	0.00994
rs372349	13	38	0.00995	PDPN
rs2064271	15	41	0.0101	PLCB1
rs590937	14	43	0.0101
rs666649	14	43	0.0101
rs4304152	4	58	0.0101
rs1181731	15	47	0.0101	LOC100131199
rs9616585	15	47	0.0101
rs17396131	15	47	0.0101	C1orf175
rs4131222	12	30	0.0101
rs3809109	4	55	0.0101	ATHL1
rs4331204	5	60	0.0102
rs10958801	5	60	0.0102
rs11162632	4	62	0.0102
rs940013	16	50	0.0102	KSR1
rs1465277	16	50	0.0102
rs2195697	16	50	0.0102	ANP32C
rs1449714	14	40	0.0103
rs4370182	14	40	0.0103
rs3105792	2	47	0.0103	GPR98
rs4740099	2	47	0.0103	TPD52
rs10116618	2	47	0.0103
rs12627150	2	47	0.0103
rs724916	9	22	0.0103	KIF13A
rs9812406	9	22	0.0103	SCHIP1
rs2162164	16	52	0.0103
rs2407072	11	29	0.0103
rs1022177	15	48	0.0103
rs229747	12	29	0.0104
rs4526593	17	52	0.0104	NOS1AP
rs17468034	17	52	0.0104
rs2192515	15	44	0.0105
rs9322025	15	44	0.0105
rs6053510	16	47	0.0105
rs6073536	12	28	0.0105	WISP2
rs929230	12	32	0.0105	CD6
rs9984499	10	26	0.0106	TIAM1
rs767034	7	9	0.0106	TRPC5
rs465169	5	62	0.0106
rs2343115	3	51	0.0107
rs10147953	3	51	0.0107	KIF26A
rs10903496	3	51	0.0107	ADARB2
rs2227274	8	16	0.0107	MATN4
rs1264551	0	27	0.0107	TRIM40
rs3104965	0	27	0.0107
rs3760586	0	27	0.0107	SLC14A1
rs4735558	0	27	0.0107
rs7581136	0	27	0.0107	ARHGAP15
rs13388095	0	27	0.0107	FMNL2
rs10400789	4	54	0.0108	FRMD6
rs2816272	13	37	0.0108
rs3753436	13	37	0.0108	RNF115
rs12543533	13	37	0.0108
rs10815923	4	57	0.0109	PTPRD
rs27723	11	28	0.0109	PDE4D
rs960738	11	28	0.0109	SEC24D
rs7207322	11	28	0.0109	GARNL4
rs913185	9	21	0.011
rs4748378	9	21	0.011
rs7260197	9	21	0.011	LOC441864
rs7918386	9	21	0.011	EIF4EBP2
rs337641	2	45	0.0111	KLF3
rs7148018	2	45	0.0111	ISCA2
rs408302	15	43	0.0111	GRIK1
rs1191117	15	43	0.0111	EML1
rs10268319	15	43	0.0111	ELMO1
rs2375994	1	43	0.0111	VLDLR
rs27949	14	42	0.0111	PDE4D
rs159784	14	42	0.0111
rs2286994	14	42	0.0111	FAM176A
rs6459474	14	42	0.0111	ATXN1
rs9456340	14	42	0.0111	SYTL3
rs12572508	15	46	0.0111
rs10733548	12	31	0.0111	PTPRD
rs4709501	2	49	0.0112	AGPAT4
rs913209	3	50	0.0112
rs1598492	3	50	0.0112	LRRK1
rs5764066	3	50	0.0112	PARVB
rs12691682	3	50	0.0112	ARHGAP15
rs13157298	3	50	0.0112
rs35607741	3	50	0.0112
rs4750458	8	18	0.0113	FRMD4A
rs2475354	10	25	0.0113	PTPRD
rs6977263	10	25	0.0113	AMPH
rs10832785	10	25	0.0113	KCNJ11
rs11936348	10	25	0.0113	EPHA5
rs13087417	10	25	0.0113	UMPS
rs13113494	10	25	0.0113
rs4976447	11	27	0.0114	SPOCK1
rs6839846	11	27	0.0114
rs7076094	11	27	0.0114	CTNNA3
rs7520966	11	27	0.0114	CYB5RL
rs9863210	11	27	0.0114
rs11485227	11	27	0.0114	HES2
rs12619445	11	27	0.0114
rs12803296	0	32	0.0114	SLC6A5
rs165548	6	11	0.0114
rs229817	6	11	0.0114
rs265158	6	11	0.0114	NRG2
rs1993067	6	11	0.0114
rs3849256	6	11	0.0114	JPH3
rs4959200	6	11	0.0114	MYLK4
rs6805141	6	11	0.0114
rs9323305	6	11	0.0114	NAT12
rs9462014	6	11	0.0114	UHRF1BP1
rs11700792	6	11	0.0114	TIAM1
rs13096759	6	11	0.0114	CLSTN2
rs17759424	6	11	0.0114	KIAA1797
rs2113545	2	44	0.0114	CHRM2
rs3122713	2	44	0.0114	FAM71A
rs6810518	2	44	0.0114	KCNIP4
rs2419724	4	53	0.0114
rs2027843	1	46	0.0114
rs2361742	13	36	0.0115
rs6079584	13	36	0.0115	MACROD2
rs10847350	13	36	0.0115
rs1406387	1	42	0.0115	SCG5
rs568	9	20	0.0115	ATP2B4
rs737467	9	20	0.0115
rs1785272	9	20	0.0115
rs2268450	9	20	0.0115	PLAGL1
rs2480246	9	20	0.0115
rs2711861	9	20	0.0115	RELN
rs6100296	9	20	0.0115
rs8100114	9	20	0.0115	ZNF616
rs9633894	9	20	0.0115	TRIM66
rs10933849	2	39	0.0115
rs11511843	9	20	0.0115
rs12483016	9	20	0.0115
rs2439969	16	51	0.0115
rs4696793	16	51	0.0115	HTRA3
rs4938161	16	51	0.0115
rs7544369	16	51	0.0115
rs1883299	15	48	0.0115
rs11135239	15	48	0.0115
rs2637254	16	53	0.0115	C10orf11
rs5950673	16	53	0.0115
rs4278081	3	53	0.0115
rs6537731	3	53	0.0115
rs270404	5	54	0.0115	BMP6
rs661451	15	42	0.0115	LAMC2
rs134056	2	43	0.0116
rs6986020	2	43	0.0116
rs976900	11	26	0.0116
rs2436916	11	26	0.0116
rs3783315	11	26	0.0116	BAZ1A
rs7016063	11	26	0.0116	SEC11B
rs10795100	11	26	0.0116
rs11117815	11	26	0.0116
rs2277403	5	61	0.0117	ANO2
rs10795650	5	61	0.0117
rs11016684	5	61	0.0117
rs11045310	5	61	0.0117	PDE3A
rs281506	0	25	0.0117	PRKCE
rs6439168	0	25	0.0117	C3orf37
rs6926970	0	25	0.0117	ENPP1
rs11773115	0	25	0.0117
rs5987579	16	44	0.0117
rs497870	9	19	0.0117
rs1007090	9	19	0.0117	RALY
rs2292986	9	19	0.0117
rs2644212	9	19	0.0117	NRG3
rs4868137	2	40	0.0117	STK10
rs9836632	2	40	0.0117
rs9957613	2	40	0.0117
rs10823959	9	19	0.0117	PRKG1
rs4482854	11	25	0.0118
rs12144044	11	25	0.0118	RHOC
rs673377	4	5	0.0118	STARD10
rs1255533	4	5	0.0118
rs1370449	4	5	0.0118	DSC1
rs1931937	4	5	0.0118
rs2121598	4	5	0.0118
rs3733359	4	5	0.0118	GC
rs3763558	4	5	0.0118	PGCP
rs3773992	4	5	0.0118	IL1RAP
rs4113422	4	5	0.0118	FAM155A
rs4768486	4	5	0.0118
rs6140774	4	5	0.0118	PLCB1
rs6490046	4	5	0.0118	MED13L
rs6972935	4	5	0.0118
rs7119491	3	49	0.0118	OPCML
rs7167566	4	5	0.0118
rs7249439	3	49	0.0118
rs7359482	4	5	0.0118
rs7569754	4	5	0.0118
rs7748053	4	5	0.0118
rs7816179	4	5	0.0118
rs7983636	4	5	0.0118
rs9483803	4	5	0.0118
rs9574424	4	5	0.0118	NDFIP2
rs9807770	4	5	0.0118
rs10061385	4	5	0.0118
rs10222587	4	5	0.0118	GRM7
rs10426383	3	49	0.0118	PTPRS
rs10489726	4	5	0.0118	C1orf21
rs10909883	4	5	0.0118	PRDM16
rs10916815	4	5	0.0118
rs10919757	4	5	0.0118
rs10997250	4	5	0.0118	CTNNA3
rs11036457	4	5	0.0118
rs11127134	3	49	0.0118	BRE
rs11194108	4	5	0.0118
rs11215212	4	5	0.0118
rs12252853	4	5	0.0118	C10orf47
rs12296113	4	5	0.0118	C12orf43
rs12336397	4	5	0.0118
rs12359500	4	5	0.0118
rs12525319	4	5	0.0118	LOC100132735
rs12682560	4	5	0.0118
rs13400473	4	5	0.0118
rs16864351	4	5	0.0118
rs17056764	4	5	0.0118
rs17061146	4	5	0.0118
rs17124581	4	5	0.0118
rs6735335	4	56	0.0118
rs7894336	4	56	0.0118	TAF3
rs899116	12	32	0.0118
rs1539144	12	32	0.0118
rs4665552	12	32	0.0118
rs13211055	12	32	0.0118	KLHL32
rs13006817	2	45	0.0118	TMEM131
rs6974835	2	42	0.0118
rs11123600	2	42	0.0118
rs1327696	5	63	0.0118
rs1941404	5	63	0.0118	NNMT
rs11658790	5	63	0.0118	GAS7
rs4915627	13	39	0.0118
rs4941279	13	39	0.0118
rs1208355	2	48	0.0118	OR2A25
rs2024874	2	48	0.0118	LRRC16A
rs10841495	16	48	0.0118
rs4672448	9	18	0.0118
rs10456660	9	18	0.0118	PAQR8
rs10771380	9	18	0.0118
rs6491033	8	19	0.0118
rs688325	10	24	0.0118	BCL9
rs754639	10	24	0.0118	TBCD
rs997891	10	24	0.0118	ACCN1
rs1241771	10	24	0.0118
rs1451109	10	24	0.0118
rs1991817	10	24	0.0118
rs2120968	10	24	0.0118	CYFIP1
rs10502025	1	35	0.0118	PDGFD
rs10984654	10	24	0.0118
rs324640	14	41	0.0119	CHRM2
rs2819091	14	41	0.0119
rs1863982	0	28	0.0119
rs5946765	0	28	0.0119
rs6781065	11	31	0.0119
rs8004291	0	28	0.0119
rs10999463	0	28	0.0119	ADAMTS14
rs11130477	0	28	0.0119	ERC2
rs11974368	0	28	0.0119	LANCL2
rs12067771	0	28	0.0119
rs12118313	0	28	0.0119	ARHGAP30
rs12916495	0	28	0.0119
rs17090673	11	31	0.0119	STOX2
rs17761793	0	28	0.0119
rs11853051	15	45	0.012
rs601223	5	9	0.012	IYD
rs303678	6	10	0.012	KIF6
rs970467	6	10	0.012	LEPR
rs998400	6	10	0.012	GARNL4
rs1565265	6	10	0.012	DDX60L
rs2047555	6	10	0.012	BCAT1
rs4296341	6	10	0.012	MYOM1
rs6136822	6	10	0.012
rs7579880	6	10	0.012
rs9952170	6	10	0.012
rs10259095	6	10	0.012	CHCHD3
rs11743598	6	10	0.012
rs12458013	6	10	0.012
rs16976147	6	10	0.012
rs17100283	6	10	0.012	NPAS3
rs35709256	6	10	0.012	FAT3
rs10800447	6	62	0.0121	C1orf114
rs2195956	0	23	0.0121
rs2633261	0	23	0.0121	DIS3L2
rs16992544	0	23	0.0121
rs6425991	5	9	0.0121
rs33857	10	23	0.0122
rs1354684	10	23	0.0122
rs2788407	10	23	0.0122
rs6432071	1	36	0.0122	C2orf48
rs4147592	4	58	0.0122	MGST3
rs12513097	12	31	0.0122
rs7845615	1	39	0.0123
rs5916887	15	39	0.0123	IL1RAPL2
rs1385060	3	52	0.0123
rs6856260	3	52	0.0123
rs7088091	3	52	0.0123	NSUN6
rs7138800	3	52	0.0123
rs4588797	3	48	0.0123	HIP1
rs4672772	3	48	0.0123
rs17011345	13	34	0.0123
rs3008013	1	37	0.0123	PDE10A
rs10019549	1	37	0.0123
rs10847807	10	22	0.0123	TMEM132D
rs13150348	10	22	0.0123
rs4383207	1	38	0.0124
rs1691016	6	9	0.0124
rs1951388	6	9	0.0124
rs2036198	6	9	0.0124	ZNF643
rs4126783	6	9	0.0124
rs6690373	6	9	0.0124	PRDM16
rs7513496	6	9	0.0124	SCCPDH
rs10516757	6	9	0.0124	ARHGAP24
rs12323086	6	9	0.0124	LRRC63
rs8099189	0	26	0.0124	C18orf1
rs2605579	16	50	0.0125	CCDC67
rs3811574	16	50	0.0125	FMNL2
rs3951338	16	50	0.0125
rs4273306	16	50	0.0125
rs10860692	16	50	0.0125
rs11857976	12	30	0.0125
rs1437169	13	33	0.0125
rs11150746	13	33	0.0125	RPTOR
rs2238057	13	41	0.0126	CACNA1C
rs552008	14	40	0.0126
rs7094556	14	40	0.0126	FXYD4
rs1943783	15	44	0.0126
rs697590	15	47	0.0127
rs879391	15	47	0.0127
rs751822	8	18	0.0127	KCNB2
rs4074395	8	18	0.0127	CDH4
rs4761177	8	18	0.0127
rs10484921	8	18	0.0127
rs10818600	8	18	0.0127
rs11181174	8	18	0.0127
rs11621047	8	18	0.0127	NPAS3
rs16986837	8	18	0.0127
rs2385015	13	31	0.0127
rs6641138	13	31	0.0127	TLR8
rs266759	4	55	0.0127	RFC4
rs7522356	4	55	0.0127	AK5
rs9455622	4	55	0.0127
rs11735967	4	55	0.0127
rs7801211	9	24	0.0127	ZNF716
rs779484	3	47	0.0127	BAI3
rs9371179	3	47	0.0127
rs9533529	5	64	0.0128	ENOX1
rs10888816	5	64	0.0128	DIO1
rs1460534	13	38	0.0128
rs324022	11	34	0.0128	DRD3
rs8122	16	52	0.0128	STEAP4
rs625051	16	52	0.0128
rs682536	7	15	0.0128	PDE4DIP
rs1548039	7	15	0.0128
rs2176659	7	15	0.0128
rs17744327	7	15	0.0128
rs1267843	16	49	0.0129	F13A1
rs277580	0	29	0.0129
rs882109	0	29	0.0129
rs1793268	0	29	0.0129	OPCML
rs2093531	11	30	0.0129
rs7782538	11	30	0.0129	SNX10
rs7798349	0	29	0.0129	VOPP1
rs10105450	11	30	0.0129	DCAF13
rs1994945	4	5	0.0129
rs2885060	4	5	0.0129
rs4951521	4	5	0.0129	TRAF5
rs12636237	4	5	0.0129	SLC9A9
rs17609863	4	5	0.0129
rs4722242	3	57	0.013	CCDC126
rs6560740	15	49	0.013	ADARB2
rs32598	2	46	0.013	EDIL3
rs334713	4	4	0.013	NFIA
rs1150740	4	4	0.013	PPP1R11
rs2076940	4	4	0.013	XPO7
rs2347338	4	4	0.013	RAC1
rs2593371	3	51	0.013
rs4828151	4	4	0.013	DACH2
rs6603125	4	4	0.013
rs11617293	4	4	0.013	LOC100129303
rs13072299	4	4	0.013
rs17088743	4	4	0.013
rs17504313	4	4	0.013	TULP4
rs11119343	14	39	0.0131	TRAF3IP3
rs4782779	3	46	0.0131	CDH13
rs7083999	11	27	0.0131
rs42067	5	8	0.0132	DYNC1I1
rs593692	5	8	0.0132
rs641320	5	8	0.0132	FAIM
rs726122	5	8	0.0132	CDH13
rs1011233	5	8	0.0132	LOC100132713
rs2333226	5	8	0.0132
rs2825937	5	8	0.0132
rs2829488	5	8	0.0132
rs2842053	5	8	0.0132
rs2868465	5	8	0.0132
rs3860110	5	8	0.0132
rs4146901	5	8	0.0132
rs4789551	5	8	0.0132	BIRC5
rs5764290	5	8	0.0132	EFCAB6
rs6476722	5	8	0.0132	GLIS3
rs6912268	5	8	0.0132
rs7316655	5	8	0.0132
rs7422711	5	8	0.0132	TMEM163
rs7427775	5	8	0.0132	LOC100128160
rs9556781	5	8	0.0132
rs9845070	5	8	0.0132	BBX
rs9939343	5	8	0.0132	EEF2K
rs10787468	5	8	0.0132	VTI1A
rs10829495	5	8	0.0132
rs11170917	5	8	0.0132
rs11679263	5	8	0.0132	LHCGR
rs12047808	5	8	0.0132	NPHS2
rs12212740	5	8	0.0132	ATG5
rs12418815	5	8	0.0132
rs16825687	5	8	0.0132	PDC
rs16897883	5	8	0.0132	PDE10A
rs17694878	5	8	0.0132
rs17825502	5	8	0.0132
rs1470652	0	24	0.0132	ARHGAP20
rs6974598	15	43	0.0132	ZNF804B
rs2246644	8	17	0.0132
rs7499231	8	17	0.0132
rs10490450	8	17	0.0132	LTBP1
rs17091300	8	17	0.0132
rs17501032	8	17	0.0132
rs7192533	4	57	0.0132
rs6128046	6	10	0.0133
rs10901639	6	10	0.0133
rs4354244	8	16	0.0134	LHFPL3
rs7333405	8	16	0.0134	NBEA
rs11702385	8	16	0.0134
rs11994981	8	16	0.0134	NCALD
rs2123696	14	38	0.0134
rs4913515	0	26	0.0135
rs6677198	0	26	0.0135
rs12433933	0	26	0.0135
rs733237	8	15	0.0135	ADAM23
rs4468690	8	15	0.0135	ALOX15B
rs17213159	8	15	0.0135	FOXP2
rs1004299	14	45	0.0135
rs1692761	12	34	0.0135
rs6963473	12	34	0.0135
rs12724252	12	34	0.0135	CAPN9
rs1509404	7	14	0.0135
rs2046913	7	14	0.0135
rs2403238	7	14	0.0135	ARHGEF4
rs4432298	7	14	0.0135
rs8124702	7	14	0.0135	DOK5
rs9428452	7	14	0.0135
rs9530025	7	14	0.0135
rs9901327	7	14	0.0135	SLC5A10
rs11601111	7	14	0.0135
rs12151350	7	14	0.0135	LOC284395
rs12501393	7	14	0.0135
rs12980118	7	14	0.0135
rs13153507	7	14	0.0135	VCAN
rs477122	13	37	0.0135
rs501139	13	37	0.0135	DLG2
rs1038983	13	37	0.0135	USP33
rs1981851	13	37	0.0135
rs6915880	13	37	0.0135	PHACTR2
rs10904103	13	37	0.0135	LOC100130652
rs12476858	13	37	0.0135
rs17319738	13	37	0.0135	PTER
rs6640534	7	10	0.0135	SHROOM2
rs4313838	4	54	0.0136	ENPP7
rs761367	11	29	0.0136	MATN4
rs1469763	11	29	0.0136
rs2664404	11	29	0.0136	GRID1
rs4810796	11	29	0.0136
rs4876265	11	29	0.0136
rs7575363	11	29	0.0136	EFR3B
rs8086975	0	30	0.0136
rs9902383	11	29	0.0136
rs9974882	11	29	0.0136
rs11976037	11	29	0.0136	OR2A5
rs12470293	11	29	0.0136
rs2221492	2	45	0.0136
rs1280054	15	46	0.0136	MYO6
rs1374313	15	46	0.0136
rs7176726	15	46	0.0136
rs9880562	15	46	0.0136	ITPR1
rs11669431	15	46	0.0136
rs11730732	15	46	0.0136
rs2385142	1	32	0.0137	ORC5L
rs2869932	1	32	0.0137	SLC9A8
rs4470164	10	27	0.0137
rs4867750	10	27	0.0137
rs9549600	1	32	0.0137
rs10508237	1	32	0.0137
rs11085336	1	32	0.0137
rs1886991	4	3	0.0137
rs1937118	4	3	0.0137
rs2304906	4	3	0.0137	ALOX12B
rs12556061	4	3	0.0137
rs9447791	12	37	0.0138
rs2327771	3	50	0.0138	ISM1
rs10249143	3	50	0.0138
rs10752086	3	50	0.0138
rs10890634	3	50	0.0138
rs1551796	7	11	0.0138
rs498911	9	23	0.0138	USH2A
rs1076106	9	23	0.0138	CECR1
rs8093301	9	23	0.0138
rs164735	2	1	0.0139	KYNU
rs232398	2	1	0.0139	NCAM2
rs644150	2	1	0.0139	PRPF4B
rs721842	2	1	0.0139
rs774392	2	1	0.0139
rs1190713	2	1	0.0139
rs1330261	2	1	0.0139
rs1420484	2	1	0.0139
rs1608652	2	1	0.0139	EPB41L4A
rs1872934	2	1	0.0139
rs1873365	2	1	0.0139
rs1881183	2	1	0.0139	RNF4
rs1990617	2	1	0.0139
rs2037595	2	1	0.0139
rs2183831	2	1	0.0139
rs2231167	2	1	0.0139	ACTL6B
rs2239355	2	1	0.0139	DOK4
rs2300494	2	1	0.0139	IMPA1
rs2381380	2	1	0.0139
rs2517169	2	1	0.0139	PDGFRL
rs2727183	2	1	0.0139	ADAMTS17
rs2830614	2	1	0.0139
rs2833359	2	1	0.0139	TIAM1
rs2865816	2	1	0.0139
rs3006901	2	1	0.0139	GLIS1
rs3820161	2	1	0.0139
rs3823254	2	1	0.0139	SUPT3H
rs4075497	2	1	0.0139
rs4243252	2	1	0.0139
rs4299259	2	1	0.0139	KLK8
rs4506733	2	1	0.0139	C12orf50
rs4686709	2	1	0.0139
rs4714135	2	1	0.0139	BTBD9
rs4741389	2	1	0.0139
rs4866203	2	1	0.0139
rs4886510	2	1	0.0139	SGK269
rs4902803	2	1	0.0139	COX16
rs5753425	2	1	0.0139	MORC2
rs5962477	2	1	0.0139	IL1RAPL2
rs6453008	5	56	0.0139
rs6463459	2	1	0.0139	C7orf57
rs6730023	2	1	0.0139	ITGB6
rs6755880	2	1	0.0139
rs6796306	2	1	0.0139	FGF12
rs6839839	2	1	0.0139	GALNT7
rs6925857	2	1	0.0139
rs6953593	2	1	0.0139
rs6992207	2	1	0.0139
rs7149837	2	1	0.0139	KCNH5
rs7273854	2	1	0.0139	MACROD2
rs7718362	2	1	0.0139	ADRA1B
rs7788681	2	1	0.0139	ZNF783
rs7906180	2	1	0.0139
rs7987761	2	1	0.0139	NUFIP1
rs8139381	2	1	0.0139	TRIOBP
rs8190650	2	1	0.0139	GAD2
rs8192641	2	1	0.0139	EMX2
rs9573625	2	1	0.0139	LMO7
rs9889106	2	1	0.0139
rs9933247	2	1	0.0139
rs9949310	2	1	0.0139
rs9995574	2	1	0.0139	2
rs10211427	2	1	0.0139
rs10488075	2	1	0.0139	FAM126A
rs10492320	2	1	0.0139
rs10505299	2	1	0.0139
rs10505830	2	1	0.0139	PLCZ1
rs10513809	2	1	0.0139	ST6GAL1
rs10964466	2	1	0.0139	SMARCA2
rs11046702	2	1	0.0139
rs11139797	2	1	0.0139
rs11202455	2	1	0.0139
rs11220741	2	1	0.0139
rs11491284	2	1	0.0139
rs11673586	2	1	0.0139
rs11848747	2	1	0.0139
rs11849247	2	1	0.0139	KCNK10
rs12058602	2	1	0.0139	SLC35F3
rs12110847	2	1	0.0139
rs12199092	2	1	0.0139
rs12408157	2	1	0.0139
rs12442585	2	1	0.0139
rs12549423	2	1	0.0139
rs12650407	2	1	0.0139
rs12658401	2	1	0.0139
rs12765460	2	1	0.0139	GRID1
rs12904667	2	1	0.0139
rs12914489	2	1	0.0139
rs12946462	2	1	0.0139
rs13241213	2	1	0.0139
rs13381391	2	1	0.0139	PARD6G
rs16827816	2	1	0.0139
rs16840825	2	1	0.0139
rs16900706	2	1	0.0139
rs16901966	2	1	0.0139
rs16957341	2	1	0.0139
rs16982689	2	1	0.0139
rs17076263	2	1	0.0139
rs17100130	2	1	0.0139
rs17100833	2	1	0.0139
rs17124886	2	1	0.0139	TTC8
rs17405722	2	1	0.0139	STAT3
rs17413103	2	1	0.0139
rs17646841	2	1	0.0139	MMP16
rs17649047	2	1	0.0139	TMOD2
rs17684039	2	1	0.0139	PALM
rs17868149	2	1	0.0139
[truncated: 4,596 more rows]
