# Supplementary material for: Investigation of multiple sclerosis-related pathways through the integration of genomic and proteomic data
Source: PeerJ. 2021 Sep 6;9:e11922. doi: 10.7717/peerj.11922 (PMC11563213; doi:10.7717/peerj.11922)
Supplement: Supplemental Information 2 [file peerj-09-11922-s002.xlsx]

## Sheet: Supplemental Table S2
Supplemental Table S2. All pathways found by the combined pathway enrichment analysis of the SNPs and proteins.
KEGG Term	KEGG ID	GWAS Occurrence	GWAS P-Value	Number of SNPs	GWAS Genes	Protein Occurrence	Protein P-Value	Proteins	Final P-Value	Cluster Number
Complement and coagulation cascades	hsa04610	10	1.14e-16	13	FGA [rs2070018]; CR1 [rs1571344]; F13A1 [rs3901123; rs34736558; rs1267843; rs1267914; rs749005]; PLG [rs9295131]; F5 [rs12131397]; C6 [rs2921184; rs1801033]; PROC [rs2069933; rs1799808]	10	8.43e-16	A2M; C3; C9; CLU; SERPINA1; SERPINC1; SERPING1	6.96e-30	17
Regulation of actin cytoskeleton	hsa04810	10	9.64e-27	36	CYFIP1 [rs7182576; rs2120968; rs17137192]; ROCK2 [rs6432187]; WASL [rs10270793]; EGFR [rs6970262]; MYLK [rs4678060; rs3911406; rs2124508; rs702032]; GNA13 [rs12944877]; PAK7 [rs6118687; rs6118709]; RAC1 [rs2347338]; PAK2 [rs6583176]; PAK4 [rs11083505; rs692364]; VAV3 [rs11576720]; ITGA4 [rs3770111]; ACTN1 [rs181484]; ITGA2 [rs27504]; FN1 [rs1404772]; VAV2 [rs7026263]; TIAM1 [rs2833359; rs845972; …	NA	NA	NA	9.64e-27	1
Focal adhesion	hsa04510	10	3.29e-26	34	FIGF [rs7877192; rs6632528]; SHC3 [rs1331189]; LAMA1 [rs658121]; IGF1R [rs2684788]; MAPK9 [rs6867398; rs17080136; rs11956696]; MAPK8 [rs17780725]; KDR [rs7692791]; ITGB6 [rs6730023]; RAC1 [rs2347338]; PAK4 [rs11083505; rs692364]; VASP [rs4803831]; VAV3 [rs11576720]; CAV3 [rs11713611]; ITGA4 [rs3770111]; ACTN1 [rs181484]; ITGA2 [rs27504]; FN1 [rs1404772]; MAPK10 [rs1469869]; ITGA10 [rs12401622]; I…	NA	NA	NA	3.29e-26	1
Adherens junction	hsa04520	10	5.38e-17	13	INSR [rs10409516]; LMO7 [rs9573625]; WASL [rs10270793]; EGFR [rs6970262]; IGF1R [rs2684788]; FER [rs7715933; rs7700630; rs7713591]; CTNNA3 [rs10997250; rs7076094; rs10997316]; RAC1 [rs2347338]; PVRL2 [rs519825]	3	2.03e-10		6.64e-25	18
ErbB signaling pathway	hsa04012	10	1.28e-23	26	CAMK2B [rs6968826; rs7796267]; EGFR [rs6970262]; MAPK9 [rs6867398; rs17080136; rs11956696]; ERBB4 [rs7585000; rs1394782; rs6711487; rs13028369]; PAK7 [rs6118687; rs6118709]; PAK2 [rs6583176]; PAK4 [rs11083505; rs692364]; NRG1 [rs10106329; rs17624592; rs9297186]; NRG2 [rs265158; rs2060296]; EREG [rs4694683]; NRG3 [rs2246165; rs2644212; rs11194200; rs1649931]; CRK [rs6502707]	NA	NA	NA	1.28e-23	1
Colorectal cancer	hsa05210	10	1.7e-15	10	TCF7L1 [rs6547608; rs10195517]; TGFB2 [rs1473527; rs1417488]; AXIN1 [rs3916990]; MAPK9 [rs6867398; rs17080136; rs11956696]; MAPK8 [rs17780725]; RAC1 [rs2347338]	3	2.88e-09		2.68e-22	1
Rap1 signaling pathway	hsa04015	10	2.35e-20	27	PARD6G [rs4799144; rs13381391]; ADCY5 [rs2877716]; IGF1R [rs2684788]; RAC1 [rs2347338]; VASP [rs4803831]; INSR [rs10409516]; MAGI2 [rs1965530; rs3807671]; TIAM1 [rs2833359; rs845972; rs9984499; rs11700792]; PLCB4 [rs7272444; rs1997696; rs1983571]; LCP2 [rs182618]; PLCB1 [rs708913; rs724110; rs6140774; rs6055910; rs2064271]; RAPGEF5 [rs17146355; rs7801397]; TLN1 [rs2295794]; CRK [rs6502707]; EPHA2…	NA	NA	NA	2.35e-20	1
Axon guidance	hsa04360	10	6.36e-20	18	NRP1 [rs870087]; DCC [rs9952189; rs6508142; rs10153433; rs10469016]; ROCK2 [rs6432187]; SEMA4B [rs4932304]; NFATC2 [rs4396773]; ABLIM1 [rs1535388]; NCK2 [rs4851870]; PAK7 [rs6118687; rs6118709]; PLXNB3 [rs5987155]; RAC1 [rs2347338]; PAK2 [rs6583176]; EPHA2 [rs12408442]; PAK4 [rs11083505; rs692364]	NA	NA	NA	6.36e-20	1
Pathways in cancer	hsa05200	10	1.51e-19	39	FIGF [rs7877192; rs6632528]; ETS1 [rs4372467; rs7924522]; IGF1R [rs2684788]; MAPK9 [rs6867398; rs17080136; rs11956696]; MAPK8 [rs17780725]; CTNNA3 [rs10997250; rs7076094; rs10997316]; RAC1 [rs2347338]; TCF7L1 [rs6547608; rs10195517]; TGFB2 [rs1473527; rs1417488]; DCC [rs9952189; rs6508142; rs10153433; rs10469016]; HGF [rs5745696]; ZBTB16 [rs12793024; rs909168; rs530532; rs378331]; STAT3 [rs174057…	NA	NA	NA	1.51e-19	1
T cell receptor signaling pathway	hsa04660	10	1.86e-19	18	VAV3 [rs11576720]; NFATC2 [rs4396773]; CBLB [rs3732555]; BCL10 [rs9887812]; VAV2 [rs7026263]; MAPK9 [rs6867398; rs17080136; rs11956696]; TEC [rs3792622]; AKT3 [rs12124113]; NCK2 [rs4851870]; PAK7 [rs6118687; rs6118709]; PRKCQ [rs591441]; CD247 [rs10918693]; PAK2 [rs6583176]; SOS2 [rs2227276]; CARD11 [rs3735124]	NA	NA	NA	1.86e-19	1
Ras signaling pathway	hsa04014	10	3.11e-19	23	ETS1 [rs4372467; rs7924522]; IGF1R [rs2684788]; MAPK9 [rs6867398; rs17080136; rs11956696]; MAPK8 [rs17780725]; RAC1 [rs2347338]; PAK2 [rs6583176]; PAK4 [rs11083505; rs692364]; KSR1 [rs940013]; INSR [rs10409516]; TIAM1 [rs2833359; rs845972; rs9984499; rs11700792]; NF1 [rs2905789]; RAPGEF5 [rs17146355; rs7801397]; SOS2 [rs2227276]; EXOC2 [rs9328356]; EPHA2 [rs12408442]	NA	NA	NA	3.11e-19	1
Chemokine signaling pathway	hsa04062	10	4.38e-19	22	ADCY2 [rs6555477; rs2973319]; WASL [rs10270793]; GNGT1 [rs180238]; RAC1 [rs2347338]; JAK3 [rs13345965]; PRKCB [rs198178]; STAT3 [rs17405722]; CXCL10 [rs4859415]; TIAM1 [rs2833359; rs845972; rs9984499; rs11700792]; CXCL12 [rs2297630]; PLCB1 [rs708913; rs724110; rs6140774; rs6055910; rs2064271]; CRK [rs6502707]; SOS2 [rs2227276]; PF4 [rs629315]	NA	NA	NA	4.38e-19	1
Calcium signaling pathway	hsa04020	10	1.15e-18	36	CAMK2B [rs6968826; rs7796267]; CHRM2 [rs10954565; rs7800170; rs17414604; rs2113545; rs324640]; CHRM3 [rs589962]; ITPR1 [rs9859826; rs9880562]; ITPR2 [rs11048689; rs7955200; rs7960020]; ITPR3 [rs6935686]; PHKA1 [rs10521352]; ADRA1B [rs7718362]; RYR3 [rs10444855; rs12440440; rs8030397; rs2339273]; MYLK [rs4678060; rs3911406; rs2124508; rs702032]; GNA14 [rs11790551; rs7035476; rs994362; rs2889774; r…	NA	NA	NA	1.15e-18	5
Proteoglycans in cancer	hsa05205	10	1.4e-18	19	CAMK2B [rs6968826; rs7796267]; ROCK2 [rs6432187]; ITPR1 [rs9859826; rs9880562]; EGFR [rs6970262]; IGF1R [rs2684788]; ERBB4 [rs7585000; rs1394782; rs6711487; rs13028369]; RAC1 [rs2347338]; CAV3 [rs11713611]; HGF [rs5745696]; STAT3 [rs17405722]; IGF2 [rs7873; rs734351]; FRS2 [rs497758; rs12230584]	NA	NA	NA	1.4e-18	1
Retrograde endocannabinoid signaling	hsa04723	10	6.74e-18	23	ITPR1 [rs9859826; rs9880562]; ITPR2 [rs11048689; rs7955200; rs7960020]; ADCY2 [rs6555477; rs2973319]; ITPR3 [rs6935686]; CACNA1C [rs11062138; rs2239028; rs2238057]; ADCY8 [rs11987135]; ADCY5 [rs2877716]; GNGT1 [rs180238]; RIMS1 [rs1970373]; GABRR1 [rs282114]; GRM5 [rs1391880]; MAPK8 [rs17780725]; PLCB1 [rs708913; rs724110; rs6140774; rs6055910; rs2064271]	NA	NA	NA	6.74e-18	5
Neurotrophin signaling pathway	hsa04722	10	8.03e-18	15	CAMK2D [rs17630012]; SHC3 [rs1331189]; RPS6KA3 [rs6418738]; MAPK8 [rs17780725]; RPS6KA2 [rs9355586]; RAC1 [rs2347338]; NTRK2 [rs41282435]; NTRK3 [rs4887399]; FRS2 [rs497758; rs12230584]; BCL2 [rs4941183; rs4987774]; RAPGEF1 [rs2296950]; CRK [rs6502707]; SOS2 [rs2227276]	NA	NA	NA	8.03e-18	1
Circadian entrainment	hsa04713	10	4.99e-17	26	RYR2 [rs12032218]; ITPR1 [rs9859826; rs9880562]; ADCY2 [rs6555477; rs2973319]; ITPR3 [rs6935686]; CACNA1C [rs11062138; rs2239028; rs2238057]; ADCY8 [rs11987135]; ADCY5 [rs2877716]; GNGT1 [rs180238]; NOS1AP [rs4526593; rs6676737]; PLCB1 [rs708913; rs724110; rs6140774; rs6055910; rs2064271]; PRKG1 [rs11001343; rs293243; rs10997549; rs10823959; rs10995319; rs16925357; rs11594206]	NA	NA	NA	4.99e-17	5
Fc gamma R-mediated phagocytosis	hsa04666	10	8.78e-16	21	VASP [rs4803831]; VAV3 [rs11576720]; MYO10 [rs17651767; rs7356599; rs152726]; PRKCE [rs4245804; rs10166692; rs281506; rs12993373; rs2034360; rs4953251; rs4952787; rs10495930; rs4074080; rs3768753]; WASL [rs10270793]; AMPH [rs6977263]; RAC1 [rs2347338]; DOCK2 [rs4867900; rs10067968]; CRK [rs6502707]	NA	NA	NA	8.78e-16	1
Glutamatergic synapse	hsa04724	10	1.74e-15	22	ITPR1 [rs9859826; rs9880562]; ITPR2 [rs11048689; rs7955200; rs7960020]; ADCY2 [rs6555477; rs2973319]; GRIK1 [rs363512; rs408302]; ITPR3 [rs6935686]; CACNA1C [rs11062138; rs2239028; rs2238057]; ADCY8 [rs11987135]; ADCY5 [rs2877716]; GNGT1 [rs180238]; GRM5 [rs1391880]; PLCB1 [rs708913; rs724110; rs6140774; rs6055910; rs2064271]	NA	NA	NA	1.74e-15	5
Insulin signaling pathway	hsa04910	10	1.93e-15	13	SHC3 [rs1331189]; INSR [rs10409516]; CBLB [rs3732555]; PHKA1 [rs10521352]; PYGL [rs883699]; SORBS1 [rs11188337]; GCK [rs4607517]; MAPK9 [rs6867398; rs17080136; rs11956696]; MAPK8 [rs17780725]; CRK [rs6502707]; SOS2 [rs2227276]	NA	NA	NA	1.93e-15	1
cGMP-PKG signaling pathway	hsa04022	10	3.09e-15	41	ITPR1 [rs9859826; rs9880562]; ADCY2 [rs6555477; rs2973319]; ITPR3 [rs6935686]; CACNA1C [rs11062138; rs2239028; rs2238057]; ADCY8 [rs11987135]; ADRA1B [rs7718362]; MYLK [rs4678060; rs3911406; rs2124508; rs702032]; GNA13 [rs12944877]; EDNRB [rs6563031]; PRKG1 [rs11001343; rs293243; rs10997549; rs10823959; rs10995319; rs16925357; rs11594206]; VASP [rs4803831]; INSR [rs10409516]; PRKCE [rs4245804; rs…	NA	NA	NA	3.09e-15	5
Oxytocin signaling pathway	hsa04921	10	3.77e-15	19	CAMK2B [rs6968826; rs7796267]; KCNJ4 [rs196057]; RYR2 [rs12032218]; CAMK2D [rs17630012]; ROCK2 [rs6432187]; ITPR1 [rs9859826; rs9880562]; ITPR2 [rs11048689; rs7955200; rs7960020]; CACNA1C [rs11062138; rs2239028; rs2238057]; ADCY8 [rs11987135]; EGFR [rs6970262]; ADCY5 [rs2877716]; EEF2K [rs9939343]; CACNG2 [rs926543]	NA	NA	NA	3.77e-15	5
MAPK signaling pathway	hsa04010	10	5.03e-15	12	MAPK9 [rs6867398; rs17080136; rs11956696]; RAC1 [rs2347338]; CACNG2 [rs926543]; PAK2 [rs6583176]; MAP2K4 [rs9788973]; IL1R1 [rs3917329]; CACNB1 [rs626657]; MAP3K13 [rs13060295]; CRK [rs6502707]; SOS2 [rs2227276]	NA	NA	NA	5.03e-15	1
Cholinergic synapse	hsa04725	10	7.79e-15	29	CHRM2 [rs10954565; rs7800170; rs17414604; rs2113545; rs324640]; ITPR1 [rs9859826; rs9880562]; ITPR2 [rs11048689; rs7955200; rs7960020]; ADCY2 [rs6555477; rs2973319]; CACNA1C [rs11062138; rs2239028; rs2238057]; ADCY8 [rs11987135]; ADCY5 [rs2877716]; GNGT1 [rs180238]; KCNQ1 [rs231918]; KCNQ2 [rs884851]; BCL2 [rs4941183; rs4987774]; KCNQ5 [rs9360588; rs9442837]; PLCB1 [rs708913; rs724110; rs6140774;…	NA	NA	NA	7.79e-15	5
Vascular smooth muscle contraction	hsa04270	10	1.03e-14	30	ITPR1 [rs9859826; rs9880562]; ITPR2 [rs11048689; rs7955200; rs7960020]; ADCY2 [rs6555477; rs2973319]; ITPR3 [rs6935686]; CACNA1C [rs11062138; rs2239028; rs2238057]; ADCY8 [rs11987135]; ADRA1B [rs7718362]; ADRA1A [rs4732874]; ADCY5 [rs2877716]; GNA13 [rs12944877]; MRVI1 [rs11042937]; PLCB1 [rs708913; rs724110; rs6140774; rs6055910; rs2064271]; RAMP1 [rs4663805]; PRKG1 [rs11001343; rs293243; rs1099…	NA	NA	NA	1.03e-14	5
Renal cell carcinoma	hsa05211	10	1.2e-14	13	TGFB2 [rs1473527; rs1417488]; HGF [rs5745696]; ETS1 [rs4372467; rs7924522]; PAK7 [rs6118687; rs6118709]; RAC1 [rs2347338]; CRK [rs6502707]; PAK2 [rs6583176]; SOS2 [rs2227276]; PAK4 [rs11083505; rs692364]	NA	NA	NA	1.2e-14	1
ECM-receptor interaction	hsa04512	10	1.24e-14	10	ITGA4 [rs3770111]; LAMA1 [rs658121]; ITGA2 [rs27504]; FN1 [rs1404772]; LAMC2 [rs547905; rs661451]; HMMR [rs299290]; ITGA8 [rs2039910; rs1451668]; ITGB6 [rs6730023]	NA	NA	NA	1.24e-14	15
DNA replication	hsa03030	10	2e-14	5	POLE4 [rs10515918]; RFC5 [rs4767654]; RFC3 [rs7319222]; RFC4 [rs266759]; RPA1 [rs17292175]	NA	NA	NA	2e-14	23
Gap junction	hsa04540	10	2.37e-14	23	ITPR1 [rs9859826; rs9880562]; ITPR2 [rs11048689; rs7955200; rs7960020]; ADCY2 [rs6555477; rs2973319]; ITPR3 [rs6935686]; ADCY8 [rs11987135]; EGFR [rs6970262]; ADCY5 [rs2877716]; PLCB1 [rs708913; rs724110; rs6140774; rs6055910; rs2064271]; PRKG1 [rs11001343; rs293243; rs10997549; rs10823959; rs10995319; rs16925357; rs11594206]	NA	NA	NA	2.37e-14	5
Inflammatory mediator regulation of TRP channels	hsa04750	10	5.9e-14	34	IL1R1 [rs3917329]; PRKCB [rs198178]; PRKCE [rs4245804; rs10166692; rs281506; rs12993373; rs2034360; rs4953251; rs4952787; rs10495930; rs4074080; rs3768753]; ITPR1 [rs9859826; rs9880562]; ITPR2 [rs11048689; rs7955200; rs7960020]; ADCY2 [rs6555477; rs2973319]; ITPR3 [rs6935686]; IL1RAP [rs2361832; rs3773992; rs1559018]; ADCY5 [rs2877716]; MAPK9 [rs6867398; rs17080136; rs11956696]; MAPK8 [rs17780725…	NA	NA	NA	5.9e-14	5
Arrhythmogenic right ventricular cardiomyopathy (ARVC)	hsa05412	10	8.91e-14	15	TCF7L1 [rs6547608; rs10195517]; ITGA4 [rs3770111]; ACTN1 [rs181484]; ITGA2 [rs27504]; ITGA10 [rs12401622]; ITGA8 [rs2039910; rs1451668]; ITGA7 [rs2293411]; CTNNA3 [rs10997250; rs7076094; rs10997316]; ITGB6 [rs6730023]; ITGA9 [rs149815; rs1984311]	NA	NA	NA	8.91e-14	15
Pathogenic Escherichia coli infection	hsa05130	10	7.02e-09	2	ROCK2 [rs6432187]; WASL [rs10270793]	1	3.72e-07	NCL	9.03e-14	7
Pancreatic cancer	hsa05212	10	9.44e-14	10	TGFB2 [rs1473527; rs1417488]; STAT3 [rs17405722]; EGFR [rs6970262]; MAPK9 [rs6867398; rs17080136; rs11956696]; MAPK8 [rs17780725]; E2F3 [rs12527393]; RAC1 [rs2347338]	NA	NA	NA	9.44e-14	1
Long-term potentiation	hsa04720	10	1.21e-13	14	CAMK2B [rs6968826; rs7796267]; CAMK2D [rs17630012]; ITPR1 [rs9859826; rs9880562]; ITPR2 [rs11048689; rs7955200; rs7960020]; CACNA1C [rs11062138; rs2239028; rs2238057]; ADCY8 [rs11987135]; GRIN2B [rs1806198]; RPS6KA3 [rs6418738]	NA	NA	NA	1.21e-13	5
Notch signaling pathway	hsa04330	10	1.24e-13	10	JAG2 [rs3784233]; NOTCH2 [rs17258606]; JAG1 [rs6040061]; NOTCH1 [rs3812605; rs3812609; rs2229974]; MAML2 [rs517140; rs516320]; MAML3 [rs6839816; rs6845848]	NA	NA	NA	1.24e-13	22
Platelet activation	hsa04611	10	1.97e-13	26	P2RY12 [rs7644001]; VASP [rs4803831]; ITPR1 [rs9859826; rs9880562]; ADCY2 [rs6555477; rs2973319]; ITPR3 [rs6935686]; ADCY8 [rs11987135]; MYLK [rs4678060; rs3911406; rs2124508; rs702032]; GNA13 [rs12944877]; LCP2 [rs182618]; PLCB1 [rs708913; rs724110; rs6140774; rs6055910; rs2064271]; PRKG1 [rs11001343; rs293243; rs10997549; rs10823959; rs10995319; rs16925357; rs11594206]	NA	NA	NA	1.97e-13	5
Spliceosome	hsa03040	10	2e-13	1	SR140 [rs936198]	NA	NA	NA	2e-13	10
Type II diabetes mellitus	hsa04930	10	2.11e-13	17	KCNJ11 [rs10832785]; INSR [rs10409516]; PRKCE [rs4245804; rs10166692; rs281506; rs12993373; rs2034360; rs4953251; rs4952787; rs10495930; rs4074080; rs3768753]; GCK [rs4607517]; MAPK9 [rs6867398; rs17080136; rs11956696]; MAPK8 [rs17780725]	NA	NA	NA	2.11e-13	1
Bacterial invasion of epithelial cells	hsa05100	10	2.3e-13	11	WASL [rs10270793]; ELMO1 [rs10268319; rs10951511]; CTNNA3 [rs10997250; rs7076094; rs10997316]; RAC1 [rs2347338]; CRK [rs6502707]; DOCK1 [rs10741150; rs6482855; rs10458718]	NA	NA	NA	2.3e-13	1
GnRH signaling pathway	hsa04912	10	2.49e-13	23	PRKCB [rs198178]; ITPR1 [rs9859826; rs9880562]; ITPR2 [rs11048689; rs7955200; rs7960020]; ADCY2 [rs6555477; rs2973319]; ITPR3 [rs6935686]; CACNA1C [rs11062138; rs2239028; rs2238057]; ADCY5 [rs2877716]; MAPK9 [rs6867398; rs17080136; rs11956696]; MAPK8 [rs17780725]; PLCB1 [rs708913; rs724110; rs6140774; rs6055910; rs2064271]; SOS2 [rs2227276]	NA	NA	NA	2.49e-13	5
Hippo signaling pathway	hsa04390	10	2.59e-13	18	TCF7L1 [rs6547608; rs10195517]; TGFB2 [rs1473527; rs1417488]; BMPR2 [rs12472248]; AXIN1 [rs3916990]; PARD6G [rs4799144; rs13381391]; CSNK1E [rs12484542]; BMP7 [rs17404303; rs6123674]; BMP6 [rs2326994; rs10498670; rs270404]; CTNNA3 [rs10997250; rs7076094; rs10997316]; BMPR1B [rs1867542]	NA	NA	NA	2.59e-13	2
TGF-beta signaling pathway	hsa04350	10	2.8e-13	12	TGFB2 [rs1473527; rs1417488]; BMPR2 [rs12472248]; BMP7 [rs17404303; rs6123674]; LTBP1 [rs107195; rs10490450; rs2276591]; BMP6 [rs2326994; rs10498670; rs270404]; BMPR1B [rs1867542]	NA	NA	NA	2.8e-13	16
Morphine addiction	hsa05032	10	2.88e-13	13	PDE4D [rs11958956; rs10042606; rs27949; rs27723; rs12109774]; ADCY2 [rs6555477; rs2973319]; ADCY8 [rs11987135]; ADCY5 [rs2877716]; GNGT1 [rs180238]; GABRR1 [rs282114]; GRK5 [rs4237510; rs11198925]	NA	NA	NA	2.88e-13	5
Nucleotide excision repair	hsa03420	10	2.91e-13	6	RFC5 [rs4767654]; RFC3 [rs7319222]; RFC4 [rs266759]; RPA1 [rs17292175]; POLE4 [rs10515918]; ERCC6 [rs1018603]	NA	NA	NA	2.91e-13	23
Prion diseases	hsa05020	4	2.48e-05	4	NOTCH1 [rs3812605; rs3812609; rs2229974]; NCAM2 [rs232398]	10	6.31e-10	C9; SOD1	5.13e-13	14
Chronic myeloid leukemia	hsa05220	10	5.29e-13	7	TGFB2 [rs1473527; rs1417488]; RUNX1 [rs9979015; rs2834646]; E2F3 [rs12527393]; CRK [rs6502707]; SOS2 [rs2227276]	NA	NA	NA	5.29e-13	1
Salivary secretion	hsa04970	10	6.77e-13	25	CHRM3 [rs589962]; ITPR1 [rs9859826; rs9880562]; ITPR2 [rs11048689; rs7955200; rs7960020]; ADCY2 [rs6555477; rs2973319]; ITPR3 [rs6935686]; ADCY8 [rs11987135]; ADRA1B [rs7718362]; ADRA1A [rs4732874]; ADCY5 [rs2877716]; PLCB1 [rs708913; rs724110; rs6140774; rs6055910; rs2064271]; PRKG1 [rs11001343; rs293243; rs10997549; rs10823959; rs10995319; rs16925357; rs11594206]	NA	NA	NA	6.77e-13	5
Fc epsilon RI signaling pathway	hsa04664	10	7.32e-13	18	VAV3 [rs11576720]; PRKCE [rs4245804; rs10166692; rs281506; rs12993373; rs2034360; rs4953251; rs4952787; rs10495930; rs4074080; rs3768753]; MAPK9 [rs6867398; rs17080136; rs11956696]; MAPK8 [rs17780725]; LCP2 [rs182618]; RAC1 [rs2347338]; SOS2 [rs2227276]	NA	NA	NA	7.32e-13	1
Thyroid hormone signaling pathway	hsa04919	10	7.43e-13	8	NOTCH2 [rs17258606]; NOTCH1 [rs3812605; rs3812609; rs2229974]; THRB [rs862247; rs6800549]; KAT2B [rs10510498]; KAT2A [rs8072215]	NA	NA	NA	7.43e-13	1
Toll-like receptor signaling pathway	hsa04620	10	8.96e-13	7	MAP2K4 [rs9788973]; MAPK10 [rs1469869]; MAPK9 [rs6867398; rs17080136; rs11956696]; MAPK8 [rs17780725]; TLR8 [rs6641138]	NA	NA	NA	8.96e-13	4
HIF-1 signaling pathway	hsa04066	10	1.09e-12	10	CAMK2B [rs6968826; rs7796267]; TF [rs4241356; rs8177313]; INSR [rs10409516]; STAT3 [rs17405722]; SLC2A1 [rs3754219]; EGFR [rs6970262]; HK1 [rs16926244]; IGF1R [rs2684788]	NA	NA	NA	1.09e-12	1
Endometrial cancer	hsa05213	10	6e-09	8	TCF7L1 [rs6547608; rs10195517]; AXIN1 [rs3916990]; EGFR [rs6970262]; CTNNA3 [rs10997250; rs7076094; rs10997316]; SOS2 [rs2227276]	1	5.77e-06		1.11e-12	1
Hypertrophic cardiomyopathy (HCM)	hsa05410	10	1.12e-12	10	ITGA4 [rs3770111]; ITGA2 [rs27504]; TTN [rs3813247]; ITGA10 [rs12401622]; ITGA8 [rs2039910; rs1451668]; ITGA7 [rs2293411]; ITGB6 [rs6730023]; ITGA9 [rs149815; rs1984311]	NA	NA	NA	1.12e-12	15
Non-small cell lung cancer	hsa05223	10	1.4e-08	12	ALK [rs7591913; rs7589120]; FHIT [rs643629; rs10510827; rs10510852; rs3772479; rs6778312; rs12633994; rs13317933; rs13078190]; SOS2 [rs2227276]; EGFR [rs6970262]	2	2.82e-06		1.26e-12	1
Shigellosis	hsa05131	10	1.42e-12	13	WASL [rs10270793]; MAPK9 [rs6867398; rs17080136; rs11956696]; MAPK8 [rs17780725]; ELMO1 [rs10268319; rs10951511]; RAC1 [rs2347338]; CRK [rs6502707]; DOCK1 [rs10741150; rs6482855; rs10458718]; ATG5 [rs12212740]	NA	NA	NA	1.42e-12	4
Wnt signaling pathway	hsa04310	10	2.03e-12	17	CAMK2B [rs6968826; rs7796267]; TCF7L1 [rs6547608; rs10195517]; AXIN1 [rs3916990]; NFATC2 [rs4396773]; CSNK1E [rs12484542]; MAPK9 [rs6867398; rs17080136; rs11956696]; MAPK8 [rs17780725]; RAC1 [rs2347338]; PLCB1 [rs708913; rs724110; rs6140774; rs6055910; rs2064271]	NA	NA	NA	2.03e-12	2
cAMP signaling pathway	hsa04024	10	2.62e-12	29	CHRM2 [rs10954565; rs7800170; rs17414604; rs2113545; rs324640]; ADCY2 [rs6555477; rs2973319]; CACNA1C [rs11062138; rs2239028; rs2238057]; ADCY8 [rs11987135]; MAPK9 [rs6867398; rs17080136; rs11956696]; MAPK8 [rs17780725]; RAC1 [rs2347338]; PDE4D [rs11958956; rs10042606; rs27949; rs27723; rs12109774]; TSHR [rs4903964; rs2284722; rs6574626; rs12050350]; TIAM1 [rs2833359; rs845972; rs9984499; rs11700…	NA	NA	NA	2.62e-12	5
Dilated cardiomyopathy	hsa05414	10	2.83e-12	10	ITGA4 [rs3770111]; ITGA2 [rs27504]; TTN [rs3813247]; ITGA10 [rs12401622]; ITGA8 [rs2039910; rs1451668]; ITGA7 [rs2293411]; ITGB6 [rs6730023]; ITGA9 [rs149815; rs1984311]	NA	NA	NA	2.83e-12	15
SNARE interactions in vesicular transport	hsa04130	6	4.03e-12	2	STX8 [rs9911154]; VTI1A [rs10787468]	NA	NA	NA	4.03e-12	27
Dopaminergic synapse	hsa04728	10	5.83e-12	19	CAMK2B [rs6968826; rs7796267]; CAMK2D [rs17630012]; ITPR1 [rs9859826; rs9880562]; ITPR2 [rs11048689; rs7955200; rs7960020]; CACNA1C [rs11062138; rs2239028; rs2238057]; GRIN2B [rs1806198]; ADCY5 [rs2877716]; MAPK10 [rs1469869]; MAPK9 [rs6867398; rs17080136; rs11956696]; MAPK8 [rs17780725]; CREB5 [rs150613]	NA	NA	NA	5.83e-12	5
Insulin secretion	hsa04911	10	7.57e-12	16	CHRM3 [rs589962]; RYR2 [rs12032218]; SNAP25 [rs4813925]; ADCY2 [rs6555477; rs2973319]; ITPR3 [rs6935686]; CACNA1C [rs11062138; rs2239028; rs2238057]; ADCY8 [rs11987135]; ADCY5 [rs2877716]; PLCB1 [rs708913; rs724110; rs6140774; rs6055910; rs2064271]	NA	NA	NA	7.57e-12	5
Glucagon signaling pathway	hsa04922	10	1.04e-11	23	ITPR1 [rs9859826; rs9880562]; ITPR2 [rs11048689; rs7955200; rs7960020]; PRKAG2 [rs2536090; rs6970522; rs4726081; rs7776530; rs4725423]; ADCY2 [rs6555477; rs2973319]; PHKA1 [rs10521352]; PYGL [rs883699]; ACACB [rs1642040; rs2241220; rs34972531]; GCK [rs4607517]; PLCB1 [rs708913; rs724110; rs6140774; rs6055910; rs2064271]	NA	NA	NA	1.04e-11	5
B cell receptor signaling pathway	hsa04662	10	1.34e-11	5	VAV3 [rs11576720]; VAV2 [rs7026263]; RAC1 [rs2347338]; SOS2 [rs2227276]; CARD11 [rs3735124]	NA	NA	NA	1.34e-11	1
FoxO signaling pathway	hsa04068	10	2.01e-11	9	INSR [rs10409516]; STAT3 [rs17405722]; CSNK1E [rs12484542]; IGF1R [rs2684788]; MAPK9 [rs6867398; rs17080136; rs11956696]; MAPK8 [rs17780725]; SOS2 [rs2227276]	NA	NA	NA	2.01e-11	1
Prolactin signaling pathway	hsa04917	10	2.1e-11	7	STAT3 [rs17405722]; GCK [rs4607517]; MAPK9 [rs6867398; rs17080136; rs11956696]; MAPK8 [rs17780725]; SOS2 [rs2227276]	NA	NA	NA	2.1e-11	1
Osteoclast differentiation	hsa04380	10	3.66e-11	11	TGFB2 [rs1473527; rs1417488]; IL1R1 [rs3917329]; NFATC2 [rs4396773]; TYK2 [rs12720356]; MAPK9 [rs6867398; rs17080136; rs11956696]; MAPK8 [rs17780725]; LCP2 [rs182618]; RAC1 [rs2347338]	NA	NA	NA	3.66e-11	4
Cell cycle	hsa04110	10	3.87e-11	3	TGFB2 [rs1473527; rs1417488]; ANAPC10 [rs17781702]	NA	NA	NA	3.87e-11	11
Estrogen signaling pathway	hsa04915	10	4.49e-11	15	ITPR1 [rs9859826; rs9880562]; ITPR2 [rs11048689; rs7955200; rs7960020]; ADCY5 [rs2877716]; PLCB4 [rs7272444; rs1997696; rs1983571]; PLCB1 [rs708913; rs724110; rs6140774; rs6055910; rs2064271]; SOS2 [rs2227276]	NA	NA	NA	4.49e-11	5
Gastric acid secretion	hsa04971	10	4.97e-11	19	ITPR1 [rs9859826; rs9880562]; ITPR2 [rs11048689; rs7955200; rs7960020]; ADCY2 [rs6555477; rs2973319]; ADCY8 [rs11987135]; ADCY5 [rs2877716]; MYLK [rs4678060; rs3911406; rs2124508; rs702032]; KCNQ1 [rs231918]; PLCB1 [rs708913; rs724110; rs6140774; rs6055910; rs2064271]	NA	NA	NA	4.97e-11	5
Proteasome	hsa03050	10	5.39e-11	1	PSMF1 [rs6514113]	NA	NA	NA	5.39e-11	24
Ribosome	hsa03010	8	7.21e-11	4	RPL32 [rs6442335]; RPS14 [rs2983102]; RPL27 [rs443759]; RPL15 [rs2001209]	NA	NA	NA	7.21e-11	8
Basal transcription factors	hsa03022	10	9.41e-11	2	TBPL1 [rs9399083]; GTF2F2 [rs17066461]	NA	NA	NA	9.41e-11	25
Bladder cancer	hsa05219	3	4.83e-06	1	E2F3 [rs12527393]	1	8.47e-07	MMP2	1.11e-10	1
TNF signaling pathway	hsa04668	10	1.52e-10	5	MAP2K4 [rs9788973]; TNFRSF1B [rs474247]; MAPK9 [rs6867398; rs17080136; rs11956696]	NA	NA	NA	1.52e-10	4
Hepatitis B	hsa05161	10	1.84e-10	7	MAP2K4 [rs9788973]; TGFB2 [rs1473527; rs1417488]; MAPK9 [rs6867398; rs17080136; rs11956696]; BIRC5 [rs4789551]	NA	NA	NA	1.84e-10	4
Pancreatic secretion	hsa04972	10	2.1e-10	21	CHRM3 [rs589962]; RYR2 [rs12032218]; PRKCB [rs198178]; ITPR1 [rs9859826; rs9880562]; ITPR2 [rs11048689; rs7955200; rs7960020]; ADCY2 [rs6555477; rs2973319]; ADCY8 [rs11987135]; SLC4A4 [rs16846318; rs3775162]; ADCY5 [rs2877716]; KCNQ1 [rs231918]; RAC1 [rs2347338]; PLCB1 [rs708913; rs724110; rs6140774; rs6055910; rs2064271]	NA	NA	NA	2.1e-10	5
Propanoate metabolism	hsa00640	3	2.19e-10	3	MCEE [rs357728]; SUCLA2 [rs1410116]; SUCLG2 [rs1490270]	NA	NA	NA	2.19e-10	28
Acute myeloid leukemia	hsa05221	10	2.21e-10	9	ZBTB16 [rs12793024; rs909168; rs530532; rs378331]; STAT3 [rs17405722]; PML [rs3784563]; RUNX1 [rs9979015; rs2834646]; SOS2 [rs2227276]	NA	NA	NA	2.21e-10	1
Thyroid hormone synthesis	hsa04918	10	3.29e-10	19	ITPR1 [rs9859826; rs9880562]; ITPR2 [rs11048689; rs7955200; rs7960020]; ADCY2 [rs6555477; rs2973319]; ITPR3 [rs6935686]; ADCY8 [rs11987135]; PLCB1 [rs708913; rs724110; rs6140774; rs6055910; rs2064271]; TSHR [rs4903964; rs2284722; rs6574626; rs12050350]; ADCY5 [rs2877716]	NA	NA	NA	3.29e-10	5
Serotonergic synapse	hsa04726	10	4.1e-10	16	ITPR1 [rs9859826; rs9880562]; ITPR2 [rs11048689; rs7955200; rs7960020]; ITPR3 [rs6935686]; CACNA1C [rs11062138; rs2239028; rs2238057]; ADCY5 [rs2877716]; GNGT1 [rs180238]; PLCB1 [rs708913; rs724110; rs6140774; rs6055910; rs2064271]	NA	NA	NA	4.1e-10	5
VEGF signaling pathway	hsa04370	10	4.18e-10	3	NFATC2 [rs4396773]; KDR [rs7692791]; RAC1 [rs2347338]	NA	NA	NA	4.18e-10	1
Apoptosis	hsa04210	13	4.65e-10	8	APAF1 [rs3815997]; IL1R1 [rs3917329]; IL1RAP [rs2361832; rs3773992; rs1559018]; IRAK2 [rs813591]; BCL2 [rs4941183; rs4987774]	NA	NA	NA	4.65e-10	1
Long-term depression	hsa04730	10	4.95e-10	20	PRKCB [rs198178]; ITPR1 [rs9859826; rs9880562]; ITPR2 [rs11048689; rs7955200; rs7960020]; ITPR3 [rs6935686]; IGF1R [rs2684788]; PLCB1 [rs708913; rs724110; rs6140774; rs6055910; rs2064271]; PRKG1 [rs11001343; rs293243; rs10997549; rs10823959; rs10995319; rs16925357; rs11594206]	NA	NA	NA	4.95e-10	5
Sphingolipid signaling pathway	hsa04071	10	5.87e-10	21	PRKCE [rs4245804; rs10166692; rs281506; rs12993373; rs2034360; rs4953251; rs4952787; rs10495930; rs4074080; rs3768753]; GNA13 [rs12944877]; MAPK9 [rs6867398; rs17080136; rs11956696]; MAPK8 [rs17780725]; RAC1 [rs2347338]; PLCB1 [rs708913; rs724110; rs6140774; rs6055910; rs2064271]	NA	NA	NA	5.87e-10	1
Leukocyte transendothelial migration	hsa04670	10	6.95e-10	7	VASP [rs4803831]; VAV3 [rs11576720]; ITGA4 [rs3770111]; ROCK2 [rs6432187]; ACTN1 [rs181484]; VAV2 [rs7026263]; RAC1 [rs2347338]	NA	NA	NA	6.95e-10	1
Chagas disease (American trypanosomiasis)	hsa05142	10	1.1e-09	9	MAP2K4 [rs9788973]; GNA14 [rs11790551; rs7035476; rs994362; rs2889774; rs10869926]; MAPK9 [rs6867398; rs17080136; rs11956696]	NA	NA	NA	1.1e-09	4
GABAergic synapse	hsa04727	7	1.15e-09	9	ADCY2 [rs6555477; rs2973319]; CACNA1C [rs11062138; rs2239028; rs2238057]; ADCY8 [rs11987135]; ADCY5 [rs2877716]; GNGT1 [rs180238]; GABRR1 [rs282114]	NA	NA	NA	1.15e-09	5
Adrenergic signaling in cardiomyocytes	hsa04261	10	1.31e-09	19	RYR2 [rs12032218]; ADCY2 [rs6555477; rs2973319]; CACNA1C [rs11062138; rs2239028; rs2238057]; ADCY8 [rs11987135]; ADRA1B [rs7718362]; ADRA1A [rs4732874]; ADCY5 [rs2877716]; BCL2 [rs4941183; rs4987774]; SCN5A [rs6599223]; CACNG2 [rs926543]; PLCB1 [rs708913; rs724110; rs6140774; rs6055910; rs2064271]	NA	NA	NA	1.31e-09	5
Amphetamine addiction	hsa05031	10	1.57e-09	10	CAMK2B [rs6968826; rs7796267]; CAMK2D [rs17630012]; FOSB [rs12373539]; CACNA1C [rs11062138; rs2239028; rs2238057]; GRIN2B [rs1806198]; ADCY5 [rs2877716]; CREB5 [rs150613]	NA	NA	NA	1.57e-09	5
Pertussis	hsa05133	6	1.76e-09	5	MAPK10 [rs1469869]; MAPK9 [rs6867398; rs17080136; rs11956696]; MAPK8 [rs17780725]	NA	NA	NA	1.76e-09	4
NF-kappa B signaling pathway	hsa04064	10	1.87e-09	5	IL1R1 [rs3917329]; BCL10 [rs9887812]; TRAF5 [rs4951521]; PRKCQ [rs591441]; CARD11 [rs3735124]	NA	NA	NA	1.87e-09	4
Adipocytokine signaling pathway	hsa04920	10	2.2e-09	12	STAT3 [rs17405722]; LEPR [rs970467]; SLC2A1 [rs3754219]; PRKAG2 [rs2536090; rs6970522; rs4726081; rs7776530; rs4725423]; TNFRSF1B [rs474247]; ACACB [rs1642040; rs2241220; rs34972531]	NA	NA	NA	2.2e-09	12
Oocyte meiosis	hsa04114	10	2.87e-09	10	RPS6KA3 [rs6418738]; RPS6KA2 [rs9355586]; ITPR1 [rs9859826; rs9880562]; ITPR2 [rs11048689; rs7955200; rs7960020]; ADCY8 [rs11987135]; ADCY5 [rs2877716]; IGF1R [rs2684788]	NA	NA	NA	2.87e-09	5
Choline metabolism in cancer	hsa05231	10	3.4e-09	10	WASL [rs10270793]; EGFR [rs6970262]; MAPK9 [rs6867398; rs17080136; rs11956696]; MAPK8 [rs17780725]; PDGFD [rs10502025; rs10895586]; RAC1 [rs2347338]; SOS2 [rs2227276]	NA	NA	NA	3.4e-09	1
Basal cell carcinoma	hsa05217	2	4.06e-09	3	AXIN1 [rs3916990]; WNT7A [rs1433354]; WNT2 [rs6947329]	NA	NA	NA	4.06e-09	2
Natural killer cell mediated cytotoxicity	hsa04650	9	4.58e-09	4	LCP2 [rs182618]; CD247 [rs10918693]; RAC1 [rs2347338]; SOS2 [rs2227276]	NA	NA	NA	4.58e-09	1
Ovarian steroidogenesis	hsa04913	9	5.95e-09	8	LHCGR [rs11897846; rs11679263]; INSR [rs10409516]; ADCY2 [rs6555477; rs2973319]; ADCY8 [rs11987135]; ADCY5 [rs2877716]; IGF1R [rs2684788]	NA	NA	NA	5.95e-09	5
Progesterone-mediated oocyte maturation	hsa04914	10	6.74e-09	7	MAPK9 [rs6867398; rs17080136; rs11956696]; MAPK8 [rs17780725]; RPS6KA2 [rs9355586]; ANAPC10 [rs17781702]; IGF1R [rs2684788]	NA	NA	NA	6.74e-09	5
Prostate cancer	hsa05215	10	8.04e-09	5	TCF7L1 [rs6547608; rs10195517]; IGF1R [rs2684788]; PDGFC [rs1469243]; SOS2 [rs2227276]	NA	NA	NA	8.04e-09	1
Non-homologous end-joining	hsa03450	6	4.27e-05	1	XRCC4 [rs2662242]	5	9.88e-06		9.53e-09	33
Butirosin and neomycin biosynthesis	hsa00524	9	1.01e-08	2	GCK [rs4607517]; HK1 [rs16926244]	NA	NA	NA	1.01e-08	20
Mismatch repair	hsa03430	10	1.16e-08	4	RFC5 [rs4767654]; RFC3 [rs7319222]; RFC4 [rs266759]; RPA1 [rs17292175]	NA	NA	NA	1.16e-08	23
Signaling pathways regulating pluripotency of stem cells	hsa04550	8	1.27e-08	5	STAT3 [rs17405722]; AXIN1 [rs3916990]; WNT7A [rs1433354]; IGF1R [rs2684788]; JAK3 [rs13345965]	NA	NA	NA	1.27e-08	1
Galactose metabolism	hsa00052	9	1.32e-08	3	GCK [rs4607517]; PGM1 [rs7535245]; HK1 [rs16926244]	NA	NA	NA	1.32e-08	20
Tight junction	hsa04530	7	1.58e-08	24	RAB3B [rs10888744]; PRKCE [rs4245804; rs10166692; rs281506; rs12993373; rs2034360; rs4953251; rs4952787; rs10495930; rs4074080; rs3768753]; MAGI2 [rs1965530; rs3807671]; INADL [rs7515512; rs11207865]; EXOC4 [rs2971971; rs3735047]; MYH9 [rs11703176]; CTNNA3 [rs10997250; rs7076094; rs10997316]; PRKCQ [rs591441]; MPDZ [rs7871226]; MYH10 [rs4791718]	NA	NA	NA	1.58e-08	7
Hepatitis C	hsa05160	5	2.09e-08	7	STAT3 [rs17405722]; TYK2 [rs12720356]; MAPK9 [rs6867398; rs17080136; rs11956696]; MAPK8 [rs17780725]; SOS2 [rs2227276]	NA	NA	NA	2.09e-08	4
Glycolysis / Gluconeogenesis	hsa00010	11	2.26e-08	3	GCK [rs4607517]; PGM1 [rs7535245]; HK1 [rs16926244]	NA	NA	NA	2.26e-08	20
Glioma	hsa05214	10	2.54e-08	6	CAMK2B [rs6968826; rs7796267]; CAMK2D [rs17630012]; SOS2 [rs2227276]; EGFR [rs6970262]; IGF1R [rs2684788]	NA	NA	NA	2.54e-08	1
Jak-STAT signaling pathway	hsa04630	5	4.01e-08	8	STAT3 [rs17405722]; CBLB [rs3732555]; TYK2 [rs12720356]; PRLR [rs37364]; SPRED2 [rs7601027]; LEPR [rs970467]; JAK3 [rs13345965]; SOS2 [rs2227276]	NA	NA	NA	4.01e-08	4
Dorso-ventral axis formation	hsa04320	10	5.04e-08	8	NOTCH2 [rs17258606]; NOTCH1 [rs3812605; rs3812609; rs2229974]; ETS1 [rs4372467; rs7924522]; SOS2 [rs2227276]; ETV6 [rs12578421]	NA	NA	NA	5.04e-08	1
Epstein-Barr virus infection	hsa05169	6	5.05e-08	9	MAPK9 [rs6867398; rs17080136; rs11956696]; JAK3 [rs13345965]; MAP2K4 [rs9788973]; STAT3 [rs17405722]; TYK2 [rs12720356]; NCOR2 [rs10846665; rs4765567]	NA	NA	NA	5.05e-08	4
Thyroid cancer	hsa05216	10	5.55e-08	1	NCOA4 [rs10995571]	NA	NA	NA	5.55e-08	1
Homologous recombination	hsa03440	2	5.81e-08	3	RAD51L1 [rs10131789; rs17104863]; RPA1 [rs17292175]	NA	NA	NA	5.81e-08	23
Toxoplasmosis	hsa05145	10	6.32e-08	6	LAMC1 [rs12138053]; TYK2 [rs12720356]; MAPK9 [rs6867398; rs17080136; rs11956696]; IL12A [rs662959]	NA	NA	NA	6.32e-08	4
Central carbon metabolism in cancer	hsa05230	11	6.35e-08	4	SLC2A1 [rs3754219]; EGFR [rs6970262]; GCK [rs4607517]; HK1 [rs16926244]	NA	NA	NA	6.35e-08	1
Viral carcinogenesis	hsa05203	7	6.37e-08	5	KAT2B [rs10510498]; KAT2A [rs8072215]; RAC1 [rs2347338]; JAK3 [rs13345965]; HIST1H4F [rs3734533]	NA	NA	NA	6.37e-08	1
Cell adhesion molecules (CAMs)	hsa04514	2	8.17e-08	13	CNTNAP2 [rs10230479; rs9648688; rs1919188]; CD80 [rs11706042]; PTPRM [rs2242148; rs4798619; rs11665565]; CD6 [rs929230]; NRCAM [rs6962066]; NCAM2 [rs232398]; PVRL2 [rs519825]; ITGA9 [rs149815; rs1984311]	NA	NA	NA	8.17e-08	9
Salmonella infection	hsa05132	13	1.02e-07	12	WASL [rs10270793]; MAPK10 [rs1469869]; MAPK9 [rs6867398; rs17080136; rs11956696]; MAPK8 [rs17780725]; MYH9 [rs11703176]; RAC1 [rs2347338]; MYH10 [rs4791718]; DYNC1I1 [rs42067; rs319324; rs319296]	NA	NA	NA	1.02e-07	4
Amyotrophic lateral sclerosis (ALS)	hsa05014	9	1.28e-07	5	APAF1 [rs3815997]; BCL2 [rs4941183; rs4987774]; RAC1 [rs2347338]; TNFRSF1B [rs474247]	NA	NA	NA	1.28e-07	6
HTLV-I infection	hsa05166	4	1.86e-07	13	ADCY2 [rs6555477; rs2973319]; ETS1 [rs4372467; rs7924522]; ANAPC10 [rs17781702]; E2F3 [rs12527393]; JAK3 [rs13345965]; MAP2K4 [rs9788973]; IL1R1 [rs3917329]; WNT7A [rs1433354]; KAT2B [rs10510498]; KAT2A [rs8072215]; TLN1 [rs2295794]	NA	NA	NA	1.86e-07	2
Melanogenesis	hsa04916	7	2.19e-07	13	CAMK2B [rs6968826; rs7796267]; TCF7L1 [rs6547608; rs10195517]; ADCY2 [rs6555477; rs2973319]; ADCY5 [rs2877716]; EDNRB [rs6563031]; PLCB1 [rs708913; rs724110; rs6140774; rs6055910; rs2064271]	NA	NA	NA	2.19e-07	5
AMPK signaling pathway	hsa04152	9	2.56e-07	5	INSR [rs10409516]; IGF1R [rs2684788]; EEF2K [rs9939343]; RHEB [rs12669535]; AKT3 [rs12124113]	NA	NA	NA	2.56e-07	12
Amoebiasis	hsa05146	8	3.18e-07	8	TGFB2 [rs1473527; rs1417488]; IL1R1 [rs3917329]; LAMA1 [rs658121]; ACTN1 [rs181484]; FN1 [rs1404772]; LAMC2 [rs547905; rs661451]	NA	NA	NA	3.18e-07	14
mTOR signaling pathway	hsa04150	7	3.88e-07	4	RPS6KA3 [rs6418738]; RHEB [rs12669535]; RPS6KA2 [rs9355586]; AKT3 [rs12124113]	NA	NA	NA	3.88e-07	1
Leishmaniasis	hsa05140	8	7.14e-07	5	TGFB2 [rs1473527; rs1417488]; CR1 [rs1571344]; ITGA4 [rs3770111]; PRKCB [rs198178]	NA	NA	NA	7.14e-07	4
Hematopoietic cell lineage	hsa04640	3	9.69e-07	5	CR1 [rs1571344]; ITGA4 [rs3770111]; IL1R1 [rs3917329]; ITGA2 [rs27504]; IL6R [rs1386821]	NA	NA	NA	9.69e-07	9
Influenza A	hsa05164	2	1.17e-06	7	MAP2K4 [rs9788973]; MX1 [rs758342]; TYK2 [rs12720356]; MAPK9 [rs6867398; rs17080136; rs11956696]; IL12A [rs662959]	NA	NA	NA	1.17e-06	4
Measles	hsa05162	3	1.22e-06	9	MX1 [rs758342]; STAT3 [rs17405722]; TACR1 [rs735668; rs11680998; rs11126453; rs3771818]; TYK2 [rs12720356]; IL12A [rs662959]; JAK3 [rs13345965]	NA	NA	NA	1.22e-06	4
Alzheimer's disease	hsa05010	3	1.48e-06	14	APP [rs7283136]; APAF1 [rs3815997]; ITPR1 [rs9859826; rs9880562]; ITPR3 [rs6935686]; CACNA1C [rs11062138; rs2239028; rs2238057]; PLCB1 [rs708913; rs724110; rs6140774; rs6055910; rs2064271]; CDK5R1 [rs8192474]	NA	NA	NA	1.48e-06	6
Small cell lung cancer	hsa05222	9	1.87e-06	13	ITGA2 [rs27504]; FHIT [rs643629; rs10510827; rs10510852; rs3772479; rs6778312; rs12633994; rs13317933; rs13078190]; TRAF5 [rs4951521]; BCL2 [rs4941183; rs4987774]; E2F3 [rs12527393]	NA	NA	NA	1.87e-06	1
Phosphatidylinositol signaling system	hsa04070	1	1.91e-06	11	ITPR1 [rs9859826; rs9880562]; ITPR2 [rs11048689; rs7955200; rs7960020]; ITPR3 [rs6935686]; PLCB1 [rs708913; rs724110; rs6140774; rs6055910; rs2064271]	NA	NA	NA	1.91e-06	13
Citrate cycle (TCA cycle)	hsa00020	10	1.98e-06	3	SUCLA2 [rs1410116]; SUCLG2 [rs1490270]; DLD [rs10238021]	NA	NA	NA	1.98e-06	29
Epithelial cell signaling in Helicobacter pylori infection	hsa05120	9	2.24e-06	5	MAP2K4 [rs9788973]; MAPK9 [rs6867398; rs17080136; rs11956696]; RAC1 [rs2347338]	NA	NA	NA	2.24e-06	4
Cocaine addiction	hsa05030	8	2.82e-06	4	GRIN2B [rs1806198]; SLC6A3 [rs6869645]; ADCY5 [rs2877716]; CDK5R1 [rs8192474]	NA	NA	NA	2.82e-06	5
Aldosterone-regulated sodium reabsorption	hsa04960	8	3.03e-06	5	INSR [rs10409516]; SCNN1A [rs2228576]; NEDD4L [rs4149597; rs2075404]; NR3C2 [rs1994624]	NA	NA	NA	3.03e-06	1
Bile secretion	hsa04976	1	3.12e-06	6	ADCY2 [rs6555477; rs2973319]; ADCY8 [rs11987135]; SLC4A4 [rs16846318; rs3775162]; ADCY5 [rs2877716]	NA	NA	NA	3.12e-06	19
NOD-like receptor signaling pathway	hsa04621	7	3.37e-06	6	MAPK10 [rs1469869]; MAPK9 [rs6867398; rs17080136; rs11956696]; MAPK8 [rs17780725]; HSP90B1 [rs4135060]	NA	NA	NA	3.37e-06	4
Melanoma	hsa05218	9	3.83e-06	6	HGF [rs5745696]; PDGFD [rs10502025; rs10895586]; PDGFC [rs1469243]; EGFR [rs6970262]; IGF1R [rs2684788]	NA	NA	NA	3.83e-06	1
Vitamin digestion and absorption	hsa04977	NA	NA	NA	NA	9	4.4e-06	APOA1; APOA4	4.4e-06	31
Proximal tubule bicarbonate reclamation	hsa04964	2	5.41e-06	2	SLC4A4 [rs16846318; rs3775162]	NA	NA	NA	5.41e-06	19
Renin-angiotensin system	hsa04614	NA	NA	NA	NA	10	5.75e-06	AGT	5.75e-06	32
RIG-I-like receptor signaling pathway	hsa04622	1	8.21e-06	5	MAPK9 [rs6867398; rs17080136; rs11956696]; MAPK8 [rs17780725]; ATG5 [rs12212740]	NA	NA	NA	8.21e-06	4
Primary immunodeficiency	hsa05340	1	8.56e-06	2	CD4 [rs2255301]; JAK3 [rs13345965]	NA	NA	NA	8.56e-06	26
Malaria	hsa05144	4	1.07e-05	4	TGFB2 [rs1473527; rs1417488]; HGF [rs5745696]; THBS2 [rs9379341]	NA	NA	NA	1.07e-05	21
Amino sugar and nucleotide sugar metabolism	hsa00520	2	1.12e-05	3	GCK [rs4607517]; PGM1 [rs7535245]; HK1 [rs16926244]	NA	NA	NA	1.12e-05	20
Pentose phosphate pathway	hsa00030	8	1.66e-05	1	PGM1 [rs7535245]	NA	NA	NA	1.66e-05	30
Starch and sucrose metabolism	hsa00500	2	2.7e-05	3	GCK [rs4607517]; PGM1 [rs7535245]; HK1 [rs16926244]	NA	NA	NA	2.7e-05	20
p53 signaling pathway	hsa04115	2	3.39e-05	1	CCND2 [rs10505729]	NA	NA	NA	3.39e-05	11
Endocytosis	hsa04144	2	3.48e-05	7	GBF1 [rs3802681; rs11191274]; NEDD4L [rs4149597; rs2075404]; CBLB [rs3732555]; EGFR [rs6970262]; IGF1R [rs2684788]	NA	NA	NA	3.48e-05	3
Fructose and mannose metabolism	hsa00051	1	4.19e-05	1	HK1 [rs16926244]	NA	NA	NA	4.19e-05	20
Viral myocarditis	hsa05416	2	4.82e-05	6	DMD [rs16990116; rs9887650; rs7879662; rs2032418; rs6653863]; RAC1 [rs2347338]	NA	NA	NA	4.82e-05	9
Occurrence numbers indicate the number of times that the corresponding pathways were found in the iterations, during which interacting partners of proteins from the SNP associations and differentially expressed proteins were also taken into account.
Empty cells in the Proteins column indicate that the protein occurrences were based on proteins indirectly related to the corresponding pathway.
