# Supplementary material for: Investigation of multiple sclerosis-related pathways through the integration of genomic and proteomic data
Source: PeerJ. 2021 Sep 6;9:e11922. doi: 10.7717/peerj.11922 (PMC11563213; doi:10.7717/peerj.11922)
Supplement: Supplemental Information 3 [file peerj-09-11922-s003.xlsx]

## Sheet: Sheet 1 - Supplemental Table S3
Supplemental Table S3. Representative pathways found by clustering of the merged enriched pathways.
KEGG Term	KEGG ID	GWAS Occurrence	GWAS P-Value	Number of SNPs	GWAS Genes	Protein Occurrence	Protein P-Value	Proteins	Final P-Value	Cluster Number
Complement and coagulation cascades	hsa04610	10	1.14e-16	13	FGA [rs2070018]; CR1 [rs1571344]; F13A1 [rs3901123; rs34736558; rs1267843; rs1267914; rs749005]; PLG [rs9295131]; F5 [rs12131397]; C6 [rs2921184; rs1801033]; PROC [rs2069933; rs1799808]	10	8.43e-16	A2M; C3; C9; CLU; SERPINA; SERPINC; SERPING1	6.96e-30	17
Regulation of actin cytoskeleton	hsa04810	10	9.64e-27	36	CYFIP1 [rs7182576; rs2120968; rs17137192]; ROCK2 [rs6432187]; WASL [rs10270793]; EGFR [rs6970262]; MYLK [rs4678060; rs3911406; rs2124508; rs702032]; GNA13 [rs12944877]; PAK7 [rs6118687; rs6118709]; RAC1 [rs2347338]; PAK2 [rs6583176]; PAK4 [rs11083505; rs692364]; VAV3 [rs11576720]; ITGA4 [rs3770111]; ACTN1 [rs181484]; ITGA2 [rs27504]; FN1 [rs1404772]; VAV2 [rs7026263]; TIAM1 [rs2833359; rs845972; …	NA	NA	NA	9.64e-27	1
Focal adhesion	hsa04510	10	3.29e-26	34	FIGF [rs7877192; rs6632528]; SHC3 [rs1331189]; LAMA1 [rs658121]; IGF1R [rs2684788]; MAPK9 [rs6867398; rs17080136; rs11956696]; MAPK8 [rs17780725]; KDR [rs7692791]; ITGB6 [rs6730023]; RAC1 [rs2347338]; PAK4 [rs11083505; rs692364]; VASP [rs4803831]; VAV3 [rs11576720]; CAV3 [rs11713611]; ITGA4 [rs3770111]; ACTN1 [rs181484]; ITGA2 [rs27504]; FN1 [rs1404772]; MAPK10 [rs1469869]; ITGA10 [rs12401622]; I…	NA	NA	NA	3.29e-26	1
Adherens junction	hsa04520	10	5.38e-17	13	INSR [rs10409516]; LMO7 [rs9573625]; WASL [rs10270793]; EGFR [rs6970262]; IGF1R [rs2684788]; FER [rs7715933; rs7700630; rs7713591]; CTNNA3 [rs10997250; rs7076094; rs10997316]; RAC1 [rs2347338]; PVRL2 [rs519825]	3	2.03e-10		6.64e-25	18
ErbB signaling pathway	hsa04012	10	1.28e-23	26	CAMK2B [rs6968826; rs7796267]; EGFR [rs6970262]; MAPK9 [rs6867398; rs17080136; rs11956696]; ERBB4 [rs7585000; rs1394782; rs6711487; rs13028369]; PAK7 [rs6118687; rs6118709]; PAK2 [rs6583176]; PAK4 [rs11083505; rs692364]; NRG1 [rs10106329; rs17624592; rs9297186]; NRG2 [rs265158; rs2060296]; EREG [rs4694683]; NRG3 [rs2246165; rs2644212; rs11194200; rs1649931]; CRK [rs6502707]	NA	NA	NA	1.28e-23	1
Colorectal cancer	hsa05210	10	1.7e-15	10	TCF7L1 [rs6547608; rs10195517]; TGFB2 [rs1473527; rs1417488]; AXIN1 [rs3916990]; MAPK9 [rs6867398; rs17080136; rs11956696]; MAPK8 [rs17780725]; RAC1 [rs2347338]	3	2.88e-09		2.68e-22	1
Rap1 signaling pathway	hsa04015	10	2.35e-20	27	PARD6G [rs4799144; rs13381391]; ADCY5 [rs2877716]; IGF1R [rs2684788]; RAC1 [rs2347338]; VASP [rs4803831]; INSR [rs10409516]; MAGI2 [rs1965530; rs3807671]; TIAM1 [rs2833359; rs845972; rs9984499; rs11700792]; PLCB4 [rs7272444; rs1997696; rs1983571]; LCP2 [rs182618]; PLCB1 [rs708913; rs724110; rs6140774; rs6055910; rs2064271]; RAPGEF5 [rs17146355; rs7801397]; TLN1 [rs2295794]; CRK [rs6502707]; EPHA2…	NA	NA	NA	2.35e-20	1
Axon guidance	hsa04360	10	6.36e-20	18	NRP1 [rs870087]; DCC [rs9952189; rs6508142; rs10153433; rs10469016]; ROCK2 [rs6432187]; SEMA4B [rs4932304]; NFATC2 [rs4396773]; ABLIM1 [rs1535388]; NCK2 [rs4851870]; PAK7 [rs6118687; rs6118709]; PLXNB3 [rs5987155]; RAC1 [rs2347338]; PAK2 [rs6583176]; EPHA2 [rs12408442]; PAK4 [rs11083505; rs692364]	NA	NA	NA	6.36e-20	1
Pathways in cancer	hsa05200	10	1.51e-19	39	FIGF [rs7877192; rs6632528]; ETS1 [rs4372467; rs7924522]; IGF1R [rs2684788]; MAPK9 [rs6867398; rs17080136; rs11956696]; MAPK8 [rs17780725]; CTNNA3 [rs10997250; rs7076094; rs10997316]; RAC1 [rs2347338]; TCF7L1 [rs6547608; rs10195517]; TGFB2 [rs1473527; rs1417488]; DCC [rs9952189; rs6508142; rs10153433; rs10469016]; HGF [rs5745696]; ZBTB16 [rs12793024; rs909168; rs530532; rs378331]; STAT3 [rs174057…	NA	NA	NA	1.51e-19	1
T cell receptor signaling pathway	hsa04660	10	1.86e-19	18	VAV3 [rs11576720]; NFATC2 [rs4396773]; CBLB [rs3732555]; BCL10 [rs9887812]; VAV2 [rs7026263]; MAPK9 [rs6867398; rs17080136; rs11956696]; TEC [rs3792622]; AKT3 [rs12124113]; NCK2 [rs4851870]; PAK7 [rs6118687; rs6118709]; PRKCQ [rs591441]; CD247 [rs10918693]; PAK2 [rs6583176]; SOS2 [rs2227276]; CARD11 [rs3735124]	NA	NA	NA	1.86e-19	1
Ras signaling pathway	hsa04014	10	3.11e-19	23	ETS1 [rs4372467; rs7924522]; IGF1R [rs2684788]; MAPK9 [rs6867398; rs17080136; rs11956696]; MAPK8 [rs17780725]; RAC1 [rs2347338]; PAK2 [rs6583176]; PAK4 [rs11083505; rs692364]; KSR1 [rs940013]; INSR [rs10409516]; TIAM1 [rs2833359; rs845972; rs9984499; rs11700792]; NF1 [rs2905789]; RAPGEF5 [rs17146355; rs7801397]; SOS2 [rs2227276]; EXOC2 [rs9328356]; EPHA2 [rs12408442]	NA	NA	NA	3.11e-19	1
Chemokine signaling pathway	hsa04062	10	4.38e-19	22	ADCY2 [rs6555477; rs2973319]; WASL [rs10270793]; GNGT1 [rs180238]; RAC1 [rs2347338]; JAK3 [rs13345965]; PRKCB [rs198178]; STAT3 [rs17405722]; CXCL10 [rs4859415]; TIAM1 [rs2833359; rs845972; rs9984499; rs11700792]; CXCL12 [rs2297630]; PLCB1 [rs708913; rs724110; rs6140774; rs6055910; rs2064271]; CRK [rs6502707]; SOS2 [rs2227276]; PF4 [rs629315]	NA	NA	NA	4.38e-19	1
Calcium signaling pathway	hsa04020	10	1.15e-18	36	CAMK2B [rs6968826; rs7796267]; CHRM2 [rs10954565; rs7800170; rs17414604; rs2113545; rs324640]; CHRM3 [rs589962]; ITPR1 [rs9859826; rs9880562]; ITPR2 [rs11048689; rs7955200; rs7960020]; ITPR3 [rs6935686]; PHKA1 [rs10521352]; ADRA1B [rs7718362]; RYR3 [rs10444855; rs12440440; rs8030397; rs2339273]; MYLK [rs4678060; rs3911406; rs2124508; rs702032]; GNA14 [rs11790551; rs7035476; rs994362; rs2889774; r…	NA	NA	NA	1.15e-18	5
Proteoglycans in cancer	hsa05205	10	1.4e-18	19	CAMK2B [rs6968826; rs7796267]; ROCK2 [rs6432187]; ITPR1 [rs9859826; rs9880562]; EGFR [rs6970262]; IGF1R [rs2684788]; ERBB4 [rs7585000; rs1394782; rs6711487; rs13028369]; RAC1 [rs2347338]; CAV3 [rs11713611]; HGF [rs5745696]; STAT3 [rs17405722]; IGF2 [rs7873; rs734351]; FRS2 [rs497758; rs12230584]	NA	NA	NA	1.4e-18	1
Retrograde endocannabinoid signaling	hsa04723	10	6.74e-18	23	ITPR1 [rs9859826; rs9880562]; ITPR2 [rs11048689; rs7955200; rs7960020]; ADCY2 [rs6555477; rs2973319]; ITPR3 [rs6935686]; CACNA1C [rs11062138; rs2239028; rs2238057]; ADCY8 [rs11987135]; ADCY5 [rs2877716]; GNGT1 [rs180238]; RIMS1 [rs1970373]; GABRR1 [rs282114]; GRM5 [rs1391880]; MAPK8 [rs17780725]; PLCB1 [rs708913; rs724110; rs6140774; rs6055910; rs2064271]	NA	NA	NA	6.74e-18	5
Neurotrophin signaling pathway	hsa04722	10	8.03e-18	15	CAMK2D [rs17630012]; SHC3 [rs1331189]; RPS6KA3 [rs6418738]; MAPK8 [rs17780725]; RPS6KA2 [rs9355586]; RAC1 [rs2347338]; NTRK2 [rs41282435]; NTRK3 [rs4887399]; FRS2 [rs497758; rs12230584]; BCL2 [rs4941183; rs4987774]; RAPGEF1 [rs2296950]; CRK [rs6502707]; SOS2 [rs2227276]	NA	NA	NA	8.03e-18	1
Circadian entrainment	hsa04713	10	4.99e-17	26	RYR2 [rs12032218]; ITPR1 [rs9859826; rs9880562]; ADCY2 [rs6555477; rs2973319]; ITPR3 [rs6935686]; CACNA1C [rs11062138; rs2239028; rs2238057]; ADCY8 [rs11987135]; ADCY5 [rs2877716]; GNGT1 [rs180238]; NOS1AP [rs4526593; rs6676737]; PLCB1 [rs708913; rs724110; rs6140774; rs6055910; rs2064271]; PRKG1 [rs11001343; rs293243; rs10997549; rs10823959; rs10995319; rs16925357; rs11594206]	NA	NA	NA	4.99e-17	5
Fc gamma R-mediated phagocytosis	hsa04666	10	8.78e-16	21	VASP [rs4803831]; VAV3 [rs11576720]; MYO10 [rs17651767; rs7356599; rs152726]; PRKCE [rs4245804; rs10166692; rs281506; rs12993373; rs2034360; rs4953251; rs4952787; rs10495930; rs4074080; rs3768753]; WASL [rs10270793]; AMPH [rs6977263]; RAC1 [rs2347338]; DOCK2 [rs4867900; rs10067968]; CRK [rs6502707]	NA	NA	NA	8.78e-16	1
Glutamatergic synapse	hsa04724	10	1.74e-15	22	ITPR1 [rs9859826; rs9880562]; ITPR2 [rs11048689; rs7955200; rs7960020]; ADCY2 [rs6555477; rs2973319]; GRIK1 [rs363512; rs408302]; ITPR3 [rs6935686]; CACNA1C [rs11062138; rs2239028; rs2238057]; ADCY8 [rs11987135]; ADCY5 [rs2877716]; GNGT1 [rs180238]; GRM5 [rs1391880]; PLCB1 [rs708913; rs724110; rs6140774; rs6055910; rs2064271]	NA	NA	NA	1.74e-15	5
Insulin signaling pathway	hsa04910	10	1.93e-15	13	SHC3 [rs1331189]; INSR [rs10409516]; CBLB [rs3732555]; PHKA1 [rs10521352]; PYGL [rs883699]; SORBS1 [rs11188337]; GCK [rs4607517]; MAPK9 [rs6867398; rs17080136; rs11956696]; MAPK8 [rs17780725]; CRK [rs6502707]; SOS2 [rs2227276]	NA	NA	NA	1.93e-15	1
cGMP-PKG signaling pathway	hsa04022	10	3.09e-15	41	ITPR1 [rs9859826; rs9880562]; ADCY2 [rs6555477; rs2973319]; ITPR3 [rs6935686]; CACNA1C [rs11062138; rs2239028; rs2238057]; ADCY8 [rs11987135]; ADRA1B [rs7718362]; MYLK [rs4678060; rs3911406; rs2124508; rs702032]; GNA13 [rs12944877]; EDNRB [rs6563031]; PRKG1 [rs11001343; rs293243; rs10997549; rs10823959; rs10995319; rs16925357; rs11594206]; VASP [rs4803831]; INSR [rs10409516]; PRKCE [rs4245804; rs…	NA	NA	NA	3.09e-15	5
Oxytocin signaling pathway	hsa04921	10	3.77e-15	19	CAMK2B [rs6968826; rs7796267]; KCNJ4 [rs196057]; RYR2 [rs12032218]; CAMK2D [rs17630012]; ROCK2 [rs6432187]; ITPR1 [rs9859826; rs9880562]; ITPR2 [rs11048689; rs7955200; rs7960020]; CACNA1C [rs11062138; rs2239028; rs2238057]; ADCY8 [rs11987135]; EGFR [rs6970262]; ADCY5 [rs2877716]; EEF2K [rs9939343]; CACNG2 [rs926543]	NA	NA	NA	3.77e-15	5
MAPK signaling pathway	hsa04010	10	5.03e-15	12	MAPK9 [rs6867398; rs17080136; rs11956696]; RAC1 [rs2347338]; CACNG2 [rs926543]; PAK2 [rs6583176]; MAP2K4 [rs9788973]; IL1R1 [rs3917329]; CACNB1 [rs626657]; MAP3K13 [rs13060295]; CRK [rs6502707]; SOS2 [rs2227276]	NA	NA	NA	5.03e-15	1
Cholinergic synapse	hsa04725	10	7.79e-15	29	CHRM2 [rs10954565; rs7800170; rs17414604; rs2113545; rs324640]; ITPR1 [rs9859826; rs9880562]; ITPR2 [rs11048689; rs7955200; rs7960020]; ADCY2 [rs6555477; rs2973319]; CACNA1C [rs11062138; rs2239028; rs2238057]; ADCY8 [rs11987135]; ADCY5 [rs2877716]; GNGT1 [rs180238]; KCNQ1 [rs231918]; KCNQ2 [rs884851]; BCL2 [rs4941183; rs4987774]; KCNQ5 [rs9360588; rs9442837]; PLCB1 [rs708913; rs724110; rs6140774;…	NA	NA	NA	7.79e-15	5
Pathogenic Escherichia coli infection	hsa05130	10	7.02e-09	2	ROCK2 [rs6432187]; WASL [rs10270793]	1	3.72e-07	NCL	9.03e-14	7
Prion diseases	hsa05020	4	2.48e-05	4	NOTCH1 [rs3812605; rs3812609; rs2229974]; NCAM2 [rs232398]	10	6.31e-10	C9; SOD1	5.13e-13	14
Endometrial cancer	hsa05213	10	6e-09	8	TCF7L1 [rs6547608; rs10195517]; AXIN1 [rs3916990]; EGFR [rs6970262]; CTNNA3 [rs10997250; rs7076094; rs10997316]; SOS2 [rs2227276]	1	5.77e-06		1.11e-12	1
Non-small cell lung cancer	hsa05223	10	1.4e-08	12	ALK [rs7591913; rs7589120]; FHIT [rs643629; rs10510827; rs10510852; rs3772479; rs6778312; rs12633994; rs13317933; rs13078190]; SOS2 [rs2227276]; EGFR [rs6970262]	2	2.82e-06		1.26e-12	1
SNARE interactions in vesicular transport	hsa04130	6	4.03e-12	2	STX8 [rs9911154]; VTI1A [rs10787468]	NA	NA	NA	4.03e-12	27
Dopaminergic synapse	hsa04728	10	5.83e-12	19	CAMK2B [rs6968826; rs7796267]; CAMK2D [rs17630012]; ITPR1 [rs9859826; rs9880562]; ITPR2 [rs11048689; rs7955200; rs7960020]; CACNA1C [rs11062138; rs2239028; rs2238057]; GRIN2B [rs1806198]; ADCY5 [rs2877716]; MAPK10 [rs1469869]; MAPK9 [rs6867398; rs17080136; rs11956696]; MAPK8 [rs17780725]; CREB5 [rs150613]	NA	NA	NA	5.83e-12	5
Glucagon signaling pathway	hsa04922	10	1.04e-11	23	ITPR1 [rs9859826; rs9880562]; ITPR2 [rs11048689; rs7955200; rs7960020]; PRKAG2 [rs2536090; rs6970522; rs4726081; rs7776530; rs4725423]; ADCY2 [rs6555477; rs2973319]; PHKA1 [rs10521352]; PYGL [rs883699]; ACACB [rs1642040; rs2241220; rs34972531]; GCK [rs4607517]; PLCB1 [rs708913; rs724110; rs6140774; rs6055910; rs2064271]	NA	NA	NA	1.04e-11	5
Bladder cancer	hsa05219	3	4.83e-06	1	E2F3 [rs12527393]	1	8.47e-07	MMP2	1.11e-10	1
Non-homologous end-joining	hsa03450	6	4.27e-05	1	XRCC4 [rs2662242]	5	9.88e-06		9.53e-09	33
Occurrence numbers indicate the number of times that the corresponding pathways were found in the iterations, during which interacting partners of proteins from the SNP associations and differentially expressed proteins were also taken into account.
Empty cells in the Proteins column indicate that the protein occurrences were based on proteins indirectly related to the corresponding pathway.
